1           **Visual cue-related activity of cells in the medial entorhinal cortex during**  
2                                           **navigation in virtual reality**

3  
4                   Amina A. Kinkhabwala<sup>1-4,#</sup>, Yi Gu<sup>1-3,#</sup>, Dmitriy Aronov<sup>1-3,5</sup>, David W. Tank<sup>1-3,\*</sup>

5  
6           <sup>1</sup> Princeton Neuroscience Institute, Princeton University, Princeton, NJ 08544, USA;

7           <sup>2</sup> Bezos Center for Neural Circuit Dynamics, Princeton University, Princeton, NJ 08544, USA;

8           <sup>3</sup> Department of Molecular Biology, Princeton University, Princeton, NJ 08544, USA;

9           <sup>4</sup> Present address: Department of Biology and Biological Engineering, California Institute of Technology,  
10 Pasadena, CA 91125, USA;

11           <sup>5</sup> Present address: Department of Neuroscience, Zuckerman Mind Brain Behavior Institute, Columbia  
12 University, New York, NY 10027.

13           # Equal contribution

14           \*Corresponding author: [dwtank@princeton.edu](mailto:dwtank@princeton.edu)

15  
16  
17           **Abstract**

18           During spatial navigation, animals use self-motion to estimate positions through path integration.  
19 However, estimation errors accumulate over time and it is unclear how they are corrected. Here we report  
20 a new cell class (“cue cell”) in mouse medial entorhinal cortex (MEC) that encoded visual cue  
21 information that could be used to correct errors in path integration. Cue cells accounted for a large  
22 fraction of unidentified MEC cells. They exhibited firing fields only near visual cues during virtual  
23 navigation and spatially stable activity during navigation in a real arena. Cue cells' responses occurred in  
24 sequences repeated at each cue and were likely driven by visual inputs. In layers 2/3 of the MEC, cue  
25 cells formed clusters. Anatomically adjacent cue cells responded similarly to cues. These cue cell  
26 properties demonstrate that the MEC circuits contain a code representing spatial landmarks that could  
27 play a significant role in error correction during path integration.

## 28 **Introduction**

29       Animals navigate using landmarks, objects or features that provide sensory cues, to estimate spatial  
30 location. When sensory cues defining position are either absent or unreliable during navigation, many  
31 animals can use self-motion to update internal representations of location through path integration  
32 (Mittelstaedt, 1982; Tsoar et al., 2011). A set of interacting brain regions, including the entorhinal cortex,  
33 parietal cortex, and the hippocampus (Brun et al., 2008; Bush et al., 2015; Calton et al., 2003; Calton et  
34 al., 2008; Clark et al., 2010; Clark et al., 2013; Clark et al., 2009; Clark and Taube, 2009; Frohardt et al.,  
35 2006; Geva-Sagiv et al., 2015; Golob and Taube, 1999; Golob et al., 1998; Hollup et al., 2001; Moser et  
36 al., 1993; Parron et al., 2004; Parron and Save, 2004; Taube et al., 1992; Whitlock et al., 2008) participate  
37 in this process.

38       The MEC is of particular interest in path integration. Grid cells in the MEC have multiple firing fields  
39 arrayed in a triangular lattice that tiles an environment (Hafting et al., 2005). This firing pattern is  
40 observed across different environments, and the grid cell population activity coherently shifts during  
41 locomotion (Fyhn et al., 2007). These observations have led to the hypothesis that grid cells form a spatial  
42 metric used by a path integrator. Given this, theoretical studies have demonstrated how velocity-encoding  
43 inputs to grid cell circuits could shift grid cell firing patterns, as expected of a path integrator (Barry and  
44 Burgess, 2014; Burak and Fiete, 2009; Fuhs and Touretzky, 2006; McNaughton et al., 2006). Cells  
45 encoding the speed of locomotion have been identified in this region (Kropff et al., 2015), providing  
46 evidence of velocity-encoding inputs and providing further support for the role of MEC in path  
47 integration.

48       A general problem with path integration is the accumulation of errors over time. A solution to this  
49 problem is to use reliable spatial cues to correct estimates of position (Evans et al., 2016; Hardcastle et al.,  
50 2015; Pollock, 2018). Many recent experimental studies showed profound impairment of grid cell activity  
51 by altering spatial cues, including landmarks and environmental boundaries. For example, the absence of  
52 visual landmarks significantly disrupted grid cell firing patterns (Chen et al., 2016; Perez-Escobar et al.,  
53 2016). Experiments that maintained the boundaries of a one-dimensional environment but manipulated  
54 nonmetric visual cues caused rate changes in grid cells (Perez-Escobar et al., 2016). The decoupling of an  
55 animal's self-motion and visual scene altered grid cell firing patterns (Campbell et al., 2018). Also, many  
56 studies have also shown that grid cell firing patterns were also influenced by nearby boundaries  
57 (Carpenter et al., 2015; Derdikman et al., 2009; Giocomo, 2016; Hardcastle et al., 2015; Krupic et al.,  
58 2015; Krupic et al., 2018; Stensola et al., 2015; Yamahachi et al., 2013).

59       Border cells in the MEC, with firing fields extending across environmental boundaries (Solstad et al.,  
60 2008), are good candidates for supplying information for error correction near the perimeter of simple  
61 arenas (Pollock, 2018). This role of border cells is supported by the fact that an animal's interactions with  
62 boundaries yielded direction-dependent error correction (Hardcastle et al., 2015). However, grid cell  
63 firing fields are maintained throughout open arenas in locations where border cells are not active and thus  
64 cannot participate in error correction. It is unclear how grid cells error correct to maintain stable firing  
65 fields within open areas of a bounded arena.

66       Also, natural navigation involves moving through landmark-rich environments with higher  
67 complexity than arenas with simple boundaries. How information from a landmark-rich environment is

68 represented within the MEC is unknown. If there were cells in the MEC that encoded sensory information  
69 of landmarks, then more robust path integration and error correction of grid cells would be possible using  
70 circuitry self-contained within this brain area. In the MEC, while border cells have been shown to respond  
71 to landmarks in virtual reality (Campbell et al., 2018), increasing evidence suggests that unclassified cells  
72 also contained information about spatial environments (Diehl et al., 2017; Hardcastle et al., 2017; Hoydal,  
73 2018; Kinkhabwala, 2015). Therefore, it would be useful to further determine whether these unclassified  
74 cells represent spatial cues (other than borders) that could be used in error correction.

75 Here we addressed this question by recording from populations of cells in the MEC during virtual  
76 navigation along landmark-rich linear tracks using electrophysiological and two-photon imaging  
77 approaches. Virtual reality (VR) allowed for complete control over the spatial information of the  
78 environment, including the presence of spatial cues along the track. The animal's orientation within the  
79 environment was also controlled, simplifying analysis. We report that a significant fraction of the  
80 previously unclassified cells in MEC respond reliably to prominent spatial cues. As a population, the cells  
81 fire in a sequence as a spatial cue was passed. They were also anatomically organized by their spatial  
82 firing patterns within layers 2/3 of the MEC. These cells could provide the information necessary in local  
83 MEC circuits for error correction during path integration in sensory rich environments that are regularly  
84 found in nature.

## 85 **Results**

### 86 **Cue-responsive cells in virtual reality**

87 Mice were trained to unidirectionally navigate along linear tracks in virtual reality to receive water  
88 rewards. Virtual tracks were 8 meters long and had a similar general organization and appearance: the  
89 tracks began with a set of black walls, followed by a short segment with patterned walls, and then ended  
90 with a long corridor with a simple wall pattern (Figure 1A). Different environments were defined by  
91 different pairs of identical visual cues (tower-like structures) present along both sides of the corridor.  
92 These cues were non-uniformly spaced along the track. The last cue was always associated with a water  
93 reward.

94 We used tetrodes to record 1590 units in the MEC of four mice (Materials and Methods and  
95 Supplementary Figure 1). Activity of a subpopulation of these units exhibited a striking pattern, with  
96 spiking occurring only near cue locations along the virtual linear tracks (Figure 1A). On each run along  
97 the track, clusters of spikes were present at cue locations, forming a vertical band of spikes at each cue in  
98 the run-by-run raster plot. Spatial firing rates were calculated by averaging this spiking activity across all  
99 runs along the track. Clear peaks in the spatial firing rate were present at cue locations. We also defined  
100 spatial firing fields as the locations along the track where the spatial firing rate exceeded 70% of the  
101 shuffled data (Materials and Methods) and observed that the spatial firing fields were preferentially  
102 located near cue locations.

103 To quantify this feature of the spatial firing rate, we developed a “cue score” that measures the  
104 relationship between a cell’s spatial firing rate and the visual cues of the environment (Figure 1B and  
105 Materials and Methods). The cue score was based on the correlation of the cell’s spatial tuning with a  
106 spatial template that had value one at each cue, and zero elsewhere. Cells with cue scores above the  
107 threshold (95<sup>th</sup> percentile of shuffled data, Materials and Methods) represented ~18% of all recorded cells  
108 (Figure 1C). In the remainder of the paper, we refer to these cells as “cue cells”.

109 We next quantified the distribution of spatial firing fields of all cue cells along the track by  
110 calculating, for each 5 cm bin, the fraction of cue cells with a spatial firing field (Materials and Methods).  
111 We defined the plot of this fraction versus location as the field distribution for all cue cells. This field  
112 distribution had peaks in locations where salient information about the environment was present (Figure  
113 1D), and some fields were correlated with the beginning of the track where wall patterns changed. The  
114 mean firing field fraction for spatial bins in cue regions ( $0.4 \pm 0.2$ ) was higher than that for bins outside of  
115 cue regions ( $0.2 \pm 0.1$ ) (paired one-tailed t-test: cell fraction in cue regions > cell fraction in outside cue  
116 regions,  $N = 283$ ,  $p < 0.001$ ). Thus, the cue score identifies a subpopulation of MEC cells with spatial  
117 firing fields correlated with prominent spatial landmarks.

118

### 119 **Cue cell responses to environment perturbations**

120 Is the activity of cue cells truly driven by the visual cues of the environment? To address this  
121 question, we designed related pairs of virtual tracks. One track had all cues present (*with-cues* track) and,  
122 in the second track, the last three cues were removed (*missing-cues* track). Tetrode recordings were  
123 performed as mice ran along both types of track in blocks of trials within the same session. Water rewards  
124 were delivered in the same location on each track regardless of the cue location differences.

125 At the beginning of both *with-cues* and *missing-cues* tracks where the tracks were identical, the  
126 spatial firing rates of cue cells were similar across tracks. Vertical bands of spikes were present in the run-  
127 by-run raster plots of both tracks and formed peaks in the spatial firing rate. The bands were also  
128 identified as spatial firing fields, which generally aligned to features of the environment (spatial  
129 cues/changes in wall patterns) present on both tracks (Figure 2A). However, the firing patterns changed  
130 dramatically from the point along the track where the environments began to differ. Spatial firing fields  
131 were prominent at cue locations along the entire remaining part of the *with-cues* track (Figure 2A, top) but  
132 were not present on the same part of the *missing-cues* track (Figure 2A, bottom). To quantify this  
133 difference, we compared changes in both cue cell spatial firing rates (Figure 2B) and in the spatial firing  
134 field distribution of the cue cell population (Figure 2C) across the two tracks. The data were split into two  
135 regions along the track (Figure 2B, left): the start region where cues were present for both tracks (gray bar  
136 marks this region, Region A - same) and the rest of the track where cues were either present or absent  
137 (blue bar, Region B - different). While cue cells showed similar mean and maximum firing rates in  
138 Region A across tracks, in Region B, mean firing rates remained the same but the maximum firing rates  
139 were lower in the *missing-cues* track compared to the *with-cues* track (maximum firing rate *with-cues*:  
140  $8.9 \pm 5$  Hz, *missing-cues*:  $7.4 \pm 4.9$  Hz, mean difference (*with-cues* – *missing-cues*): 1.5 Hz; paired one-  
141 tailed t-test: maximum firing rate in Region B on *with-cues* track > maximum firing rate in Region B on  
142 *missing-cues* track,  $N = 161$ ,  $p < 0.001$ ). Moreover, cue cells had spatial firing fields clustered in each  
143 region where a cue was located on both tracks, but these fields were not present when cues were removed  
144 in Region B of the *missing-cues* track (Figure 2C). The mean fraction of cells with spatial firing fields  
145 was significantly higher when cues were present in comparison to when they were removed (Region B in  
146 cue bins: mean cell fraction on *with-cues* track:  $0.41 \pm 0.01$ , on *missing-cues* track:  $0.33 \pm 0.04$ ; paired  
147 one-tailed t-test: *with-cues* cell fraction > *missing-cues* cell fraction,  $N = 161$ ,  $p < 0.02$ ). These results  
148 demonstrate that cue cells are more coherently active in regions along an environment where cues are  
149 located. When these cues are removed, these cells remain active but they do not coherently form spatial  
150 firing fields, indicating that the responses of these cells are correlated to the presence of the cues.

151

### 152 **Relationship to previously defined cell classes**

153 To relate our population of cells recorded along linear tracks in virtual reality to previously  
154 characterized cell types in the MEC, the same cells were also recorded as the animal foraged for chocolate  
155 chunks in a real two-dimensional (2D) environment ( $0.5\text{m} \times 0.5\text{m}$ ). From the recordings in the real arena,  
156 we calculated grid, border, and head direction scores for all recorded cells (i.e. both cue and non-cue cells,  
157 Materials and Methods). We plotted the values of these spatial scores against the cue scores, which were  
158 calculated for the same cell during VR navigation, to determine the relationship of cue cells and the  
159 previously defined cell classes (Figure 3A). We found that a small percentage of cue cells were  
160 conjunctive with border (10%) or grid (18%) cell types, but the majority of cue cells had a significant  
161 head direction score (53%) (since the head direction score is based on orientation tuning, we do not  
162 consider the head direction cell type to be a spatial cell type). The total percentage of cue cells (18%) in  
163 the dataset was comparable to that of grid and border cells (Figure 3B).

164 Since most cue cells (72%) were not conjunctive with a previously known spatial cell type, we next  
165 examined what their spatial activity patterns were in the real arena. As expected from their scores, most  
166 cells had irregular activity patterns in the arena and were not classified as any previously identified spatial  
167 cell type (Figure 3C and Supplementary Figure 2, the activity patterns of cue cells in the real environment  
168 are shown in the top and middle panels).

169 One striking feature of the spatial firing patterns of cue cells observed in real environments was the  
170 spatial stability of these complex and irregular patterns (Materials and Methods). The spatial firing rates  
171 in the real arena from the first and the second halves of the recording for 10 cue cells are shown in Figure  
172 3C. We calculated the spatial stability as the correlation between these two halves and found that the  
173 spatial firing patterns were irregular but surprisingly stable. To further quantify this observation, we  
174 calculated the distributions of the stability of both the spatial and head direction firing rates for all cell  
175 types (Materials and Methods) (Boccaro et al., 2010). We found that the distributions of stability for  
176 unclassified cells (not classified as cue, grid, border, or head direction cells, labeled as “Other”) were  
177 generally shifted towards lower values compared to all the currently classified cells, indicating that a large  
178 fraction of the remaining unclassified cells do not stably encode spatial and head direction information in  
179 the real arena (Figure 3D). Figure 3E shows the fractions of all cells with significant stability scores for  
180 their spatial firing rates in the real arena, classified by cell type. While some cue cells were conjunctive  
181 with border or grid cells, a large percentage (72%) of cue cells were previously unclassified as a particular  
182 spatial cell type. Cue cells accounted for 13% of the population of spatially stable cells, and for 22% of  
183 the previously unclassified spatially stable cells.

184

### 185 **Cue cells form a sequence at cue locations**

186 For many cue cells, we observed that their firing fields had varying spatial shifts relative to the cue  
187 locations on virtual tracks (Figure 1A). We next investigated whether these shifts were consistent for a  
188 given cell across cues, suggesting that the spatial shift is a property for each cue cell similar to the spatial  
189 shift that defines the location of grid cell firing patterns. This would provide an overall patterning of the  
190 population of cue cell activity within an environment.

191 To test this, we took all cue cells identified for each virtual track and ordered their spatial firing rates  
192 and fields by the values of their spatial shift relative to the cue template, which was the smallest  
193 displacement of the cue template to best align with the firing rate (Figures 4A and 4B; Materials and  
194 Methods). We found a striking pattern where cue cells formed a sequence of spatial firing fields that was  
195 repeated at each cue. To examine if this pattern was produced by the concentration of neural firing around  
196 cues, rather than the alignment and ordering of the data alone, we compared this pattern to that of time-  
197 shuffled data, which were created by circularly permuting spike times of each cell by a random amount of  
198 time (Supplementary Figure 3, Materials and Methods). Time shuffled data did not exhibit an obvious  
199 sequence. This difference between the cue cells and shuffled data was further quantified by a ridge-to-  
200 background ratio (Materials and Methods), which was computed as the mean firing rate in a band  
201 centered on the sequential spatial firing rates of the cue cell population divided by the mean background  
202 rate outside of this band. We note that although ordering the spatial firing rates of the cells by their spatial  
203 shift was expected to create a ridge of firing rate along the diagonal, the mean ridge/background ratio for

204 cue cells (2.58) was higher than that for time shuffled data ( $1.04 \pm 0.003$ ,  $p < 0.001$ ;  $N = 283$  cue cells,  
205 1,000 shuffles). Thus, the sequence represents sequential neural activity preferentially located near cue  
206 locations, rather than an artifact of ordering the data.

207 Since the virtual environment cues have various shapes and sizes, we next examined the alignment of  
208 cue cell spatial firing rates with each cue. We determined the location and amplitude of the peaks in the  
209 cue cell spatial firing rate and plotted these relative to each cue. We observed high peak amplitudes close  
210 to the cue locations for both tracks (Figures 4C and 4E). To determine how cue cell activity was aligned  
211 to cues, we also plotted cue cell spatial firing rate peaks and spatial firing fields aligned to the start,  
212 middle, and end of the cues to determine whether the sequences were more aligned to a particular region  
213 of the cue (start, middle, or end; Figures 4D and 4F). For each environment, we found the activity of all  
214 cue cells was best aligned to the center of the cue rather than the start or end of the cues (mean  
215 displacement  $\pm$  standard error from position of alignment for the cue cell spatial firing rate peaks closest  
216 to each alignment location: cue start aligned:  $-49.0 \text{ cm} \pm 1.6$ , cue center aligned:  $2.7 \pm 1.3 \text{ cm}$ , cue end  
217 aligned:  $25.8 \pm 1.1 \text{ cm}$ ; for cue cell spatial firing fields located within  $\pm 50 \text{ cm}$  of alignment location: cue  
218 start aligned:  $-9.0 \pm 1.2 \text{ cm}$ , cue center aligned:  $2.2 \pm 1.1 \text{ cm}$ , cue end aligned:  $-6.5 \pm 1.1 \text{ cm}$ ). Thus, cue  
219 cells, as a population, are activated in a sequence that is centered on prominent visual landmark locations.  
220

### 221 **Cue cell pairwise activity patterns**

222 Since cue cells are activated sequentially, do pairs of cue cells exhibit a correlation in their spike  
223 timing? We reasoned that temporal shifts (peaks in the spike time cross correlation function) should be  
224 observed between the firing of co-recorded cue cells that have peak activity at different spatial shifts in  
225 the sequence surrounding. Since the temporal correlation is a measurement of the spiking of these cells  
226 over time, this can be a useful measurement of the cue-independent activity of the population of cue cells,  
227 and thus represent an intrinsic relationship between cue cells in the MEC neural circuit.

228 We took all identified pairs of cue cells in our data and examined the spatial and temporal  
229 relationships of their spiking. Figure 5A shows several examples of the spiking of two cue cells recorded  
230 during ten runs on a virtual track. As expected from the cue cell spatial sequences described earlier, in  
231 many cases cue cell spatial firing patterns for pairs were offset relative to one another in space. To  
232 determine if there was a correlation of one cell to another in their spike timing, we calculated the spike  
233 time cross-correlogram for the spike times of each pair of cells. We observed that many pairs showed a  
234 temporal shift in the spike time cross-correlogram (Figure 5A, right). In Figure 5B, we calculated the  
235 relative spatial shift (peak in cross correlation of spatial firing rate) along with a temporal shift for each  
236 cue cell pair and plotted them in a 2D histogram. There is, as predicted, a general trend where the spatial  
237 and temporal shifts are correlated (Pearson correlation = 0.3).

238 If the temporal correlations are produced by the sequential activation of the cells as cues are passed,  
239 then these correlations should disappear if the analysis is performed during times when no cues are  
240 present. Conversely, if correlations remain, this might provide an indication that the spike timing  
241 relationship between cells was produced independent of cues through intrinsic circuit mechanisms. Since  
242 we showed in Figure 5 that pairs of cue cells can be assigned both a spatial and temporal shift, we next  
243 asked whether there might still be a relationship between the spiking of the two cue cells even when cues

244 are no longer present and the cells are active (despite the fact that no obvious sequence of activity is  
245 present in these regions without cues). Using a strategy similar to that used in Figure 2, we recorded from  
246 cue cells during virtual navigation on the *with-cues* and *missing-cues* tracks, and split the tracks into two  
247 regions: the start region where cues were identically present on both tracks (Region A), and the remaining  
248 region where cues were either present on *with-cues* track or missing on the *missing-cues* track (Region B).  
249 Using all cue cell pairs, we calculated the temporal shift for each pair in the four conditions (Regions A  
250 and B on both *with-cues* and *missing-cues* tracks). In Region A, there was a spread in the temporal shifts  
251 for pairs of cue cells and these shifts were correlated for the two tracks (Figure 5C left, Pearson  
252 correlation = 0.34). However, the temporal shifts in Region B of the two tracks were less correlated:  
253 while a similar spread of temporal shifts was observed when cue cells were recorded on the *with-cues*  
254 track (plotted along the x-axis of the bottom right panel in Figure 5C), but most cue cell pairs did not have  
255 a nonzero phase in their relative spike timing when cues were missing (plotted along the y-axis of the  
256 bottom right panel in Figure 5C right, Pearson correlation = 0.13). This suggests that the spike timing  
257 relationship between cue cell pairs is present only when cues are present and thus when these cells are  
258 driven to be active in a sequential manner by locomotion past the cue.

259

### 260 **Side-preference of cue cells in superficial layers of the MEC**

261 What type of sensory inputs could be driving the activity of cue cells? One potential candidate is  
262 visual input corresponding to spatial cues along the track, as suggested by the fact that the cue related  
263 spatial fields and the temporal shifts of cue cell spikes no longer existed when cues were removed from  
264 the track (Figures 2A and 5C). If visual input indeed drives cue cell responses, the cue cells in one  
265 hemisphere of the MEC, which receives inputs largely from the ipsilateral visual cortex (Olsen et al.,  
266 2017), should preferentially respond to cues on the contralateral side of the animal, as the visual cortex in  
267 one hemisphere generally receives visual information from the contralateral eye (Erskine and Herrera,  
268 2014). To investigate this possibility, we designed an 18-meter long virtual track with asymmetric cues on  
269 the left and right sides of the track (different from the tracks used in above experiments, where identical  
270 visual cues were present on both sides of the track) and examined cue cell responses to these cues (Figure  
271 6A). To increase the sampling and obtain precise anatomical information of cue cells in specific layers of  
272 the MEC, we used microprism-based cellular-resolution two-photon imaging to measure calcium  
273 responses of a large number of neurons in layers 2 and 3 of the MEC (Low et al., 2014). The genetically-  
274 encoded calcium indicator GCaMP6f was specifically expressed in layer 2 excitatory neurons of the MEC  
275 in the GP5.3 transgenic mice (Dana et al., 2014; Gu et al., 2018) and in layer 3 MEC neurons via viruses  
276 targeted to layer 3 of the MEC in wild type mice (Supplementary Figure 4). We only imaged neurons in  
277 the MEC on the left hemisphere.

278 During virtual navigation, we identified cue cells responding to the left, right, and both-side cues by  
279 calculating cue scores of their calcium responses along the virtual track with the three side-specific cue  
280 templates. Therefore, each cell had three cue scores. The highest score that passed the cue score threshold  
281 was used as the cue score of the cell, and the cell was thus assigned as a cue cell responding to the side of  
282 cues producing the highest score (Figure 6B). In both layers 2 and 3, we identified cells that responded to  
283 all three side categories of cues (Figure 6C) and formed sequences around these cues (Figure 6D).



284 However, the majority of cue cells preferentially responded to cues on a single side (left or right) (96.9%  
285 and 98.0% for layers 2 and 3, respectively). While all imaging experiments were performed in the left  
286 hemisphere, there were significantly more right cue cells than left cue cells in both layers (Figure 6E and  
287 6G). Also, in layer 2, the cue scores of the right cue cells were generally higher than those of the left cue  
288 cells, indicating the higher correlation of calcium responses of cue cells to right side cues (Figure 6F).  
289 This was not the case for layer 3 (Figure 6H). Overall, these results indicate that in superficial layers of  
290 the left MEC most cue cells respond to cues on the right side, strongly suggesting the role of side-specific  
291 visual input in driving the cue-related responses in these cells.

292

### 293 **Micro-organization of cue cells in the MEC**

294 Cellular-resolution two-photon imaging provides detailed anatomical information of imaged neurons.  
295 This allowed for the study of the micro-organization of cue cells, providing additional information about  
296 potential connectivity between the cells and the inputs they receive. Since the majority of cue cells only  
297 responded to cues on single sides, we largely focused on right or left cue cells for this micro-organization  
298 study. A single field of view (FOV) in layer 2 or 3 generally contained multiple right and left cue cells  
299 (Figures 7A, B, D, and E). However, we observed that these cue cells tended to cluster, which was  
300 revealed by the shorter physical distances between cue cells than the distances between cue and non-cue  
301 cells (Figures 7C and 7F, left panels). In addition, cue cells with the same side preferences also tended to  
302 cluster, indicated by the fact that cue cells with the same side preferences generally showed shorter  
303 physical distances than those with different side preferences (Figures 7C and 7F, middle and right panels).

304 We also investigated the relationship between the physical distances of cue cells and the difference of  
305 the spatial shifts of their calcium responses relative to cue location. In layers 2 and 3, we consistently  
306 observed that anatomically adjacent cue cells (physical distances around 30  $\mu\text{m}$ ) showed more similar  
307 spatial shifts, whereas the relationship was more varied if cue cells were further apart (Figures 7G-7N).  
308 The similar cue responses of adjacent cue cells suggest that they may share similar inputs or be  
309 connected.

310

### 311 **Discussion**

312 We have described a novel class of cells in MEC—termed cue cells—that were defined by a spatial  
313 firing patterns consisting of spatial firing fields located near prominent visual landmarks. When  
314 navigating a cue-rich virtual reality linear track, the population of cue cells formed a sequence of neural  
315 activity that was repeated at every landmark and aligned to the landmark centers. When cues were  
316 removed, these cells no longer exhibited a sequence of spatial firing fields but remained active, although  
317 typically at a lower maximum firing rate. There were spatial and temporal shifts between pairs of cue  
318 cells when cues were present, but these shifts disappeared in the absence of cues, consistent with the idea  
319 that their responses were driven primarily by sensory input rather than internal brain dynamics. The  
320 sensory input was likely visual input, as supported the fact that cue cells in the superficial layers of the  
321 left MEC mostly responded to cues on the right side of the track. In layers 2 and 3 of the MEC, all cue  
322 cells clustered, and more specifically, cue cells with the same side preferences also clustered. The spatial  
323 responses of anatomically adjacent cue cells had similar spatial shifts to cue patterns on their preferred

324 side of the track. These properties of cue cells suggest that they could provide a source of spatial  
325 information in the local circuits of MEC that could be used in error correction in landmark rich  
326 environments.

### 327 **Cue cells and previously identified cell types**

328 By recording during foraging in real arenas, we were able to determine how cue cells were related to  
329 previously identified MEC cell types (grid, head direction, border), all of which are defined by their  
330 activity in bounded 2D environments. We found that most cue cells were not grid or border cells, yet they  
331 did have noticeably stable, and somewhat irregular, spatial firing patterns in real arenas. Cue cells account  
332 for a significant fraction (~22 %) of the previously unexplained spatially-stable cells in MEC. While most  
333 cue cells were not grid or border cells, a vast majority of them had some orientation tuning (~50%). The  
334 high prevalence of head direction tuning for these cells suggests either that cue cells may receive inputs  
335 from traditional head direction cells, or that a head direction preference is present for cue cells because of  
336 the location of particular features of the real arena that drives the activation of cue cells. Further work is  
337 required to determine the circuit mechanisms of this orientation tuning preference.

338 Do cue cells resemble spatially modulated cells in other brain regions, such as place cells or boundary  
339 vector cells? Place cells typically have only a single firing field during navigation along linear tracks,  
340 even in virtual reality environments with prominent visual cues along the tracks (Dombeck et al., 2010).  
341 This is distinctly different from cue cells, in which the number of spatial firing fields scales with the  
342 number of cues. Boundary vector cells, which were found in subiculum, encode distance to a boundary  
343 (Lever et al., 2009; Stewart et al., 2014). An identified boundary vector cell must have a spatial firing  
344 field that is uniformly displaced from a particular region of the boundary. The width of the spatial firing  
345 field is proportional to the distance from the boundary, meaning that cells shifted significantly from the  
346 border would have very wide spatial firing fields, which could cover a large majority of the environment  
347 (Lever et al., 2009; Stewart et al., 2014). Border cells are a special case of boundary vector cells. To  
348 determine whether cue cells might be boundary vector cells, we sorted their spatial responses in the real  
349 2D arena based on the shifts of their spatial firing rates from the visual cue pattern on a virtual track  
350 (Supplementary Figure 2). We found no obvious trends in the spatial firing patterns of these cue cells in  
351 the real arena. Along with this, many cells had multiple fields or fields that were not uniformly displaced  
352 from the border of the environment. These spatial firing field features of cue cells were inconsistent with  
353 those of boundary vector cells. Thus, cue cells have properties distinct from both place cells and boundary  
354 vector cells. Their spatial firing responses were distributed throughout the arena, despite there being a  
355 single white cue card visible, indicating that these cells perform more complex computations in real  
356 arenas where spatial cues take many forms in comparison to the cues along a virtual track. Previous  
357 studies have also found similar complex responses of non-grid cells in the MEC encoding features of real  
358 environments (Diehl et al., 2017; Hardcastle et al., 2017).

### 359 **Cue cells and path integration**

360 It has been hypothesized that the MEC is a central component of a path integrator that uses self-  
361 motion information to update a spatial metric encoded by the population of grid cells (Burak and Fiete,  
362 2009; Fuhs and Touretzky, 2006; McNaughton et al., 2006). Grid cells are grouped into modules based on  
363 each cell's grid spacing. Each grid module maintains its own orientation, to which all grid cells align and

364 are related by a two-dimensional spatial phase. Grid cells in a given module maintain their relative spatial  
365 phase offsets across different environments (Fyhn et al., 2007), including linear tracks (Yoon et al., 2016),  
366 indicating that the population of grid cells form a consistent spatial metric largely defined only by the  
367 two-dimensional phase. This provides support for the idea that grid cell dynamics are constrained to a  
368 two-dimensional attractor manifold (Yoon et al., 2013). In a manifold-based path integrator, spatial  
369 location is represented as the location of the grid cell population activity on the attractor manifold. Self-  
370 motion signals, such as running speed in a particular direction, move the population activity along the  
371 manifold, such that changes in location are proportional to the integral of the velocity over time. Path  
372 integration is inherently a noisy process that requires calibration and error correction for more accurate  
373 estimates of position.

374 In the context of continuous attractor models for path integration, it is interesting to consider the  
375 potential functional roles of cue cells. One role could be to act as external error-correction inputs to the  
376 path integrator network that tend to drive the neural activity pattern to manifold locations appropriate for  
377 each landmark. An analogous use was proposed for border cells, in which they contribute to error  
378 correction near boundaries (Hardcastle et al., 2015; Pollock, 2018). In this role, it would be advantageous  
379 if the cue cell population activity represented distinct cues differently, so that more refined information  
380 about the locations of individual cues might be coded in cue cell firing and used in the correction. In  
381 Supplementary Figure 5, we provide preliminary evidence that the population activity of cue cells  
382 encoded information about the particular identity of each cue. More work is needed to further characterize  
383 the precise nature of this precise coding of unique landmarks and, with new models, to determine how  
384 effectively it might be used to drive an attractor network to the appropriate spatial locations when  
385 interacting with a noisy path integrator.

386 An alternative, or additional, role for cue cells in path integration would be to produce a continuous  
387 adjustment of location. The sequence of activity that was produced across the cue cell population as  
388 individual landmarks were passed could drive the network activity continuously along the manifold, in  
389 essence acting as a velocity input that is quite different from those traditionally considered, such as  
390 running speed. This use, as an effective velocity, is analogous to the recent demonstration (Hopfield,  
391 2015; Ocko, 2018) that the collective state of a line attractor can be moved continuously along the  
392 manifold by an appropriately learned sequence of external inputs. In essence, the set of inputs at each  
393 time point move the location of the activity on the attractor a slight amount, and this is repeated  
394 continuously to produce smooth motion, without requiring asymmetric synaptic connectivity and  
395 velocity-encoding signals of previous path integrator models (Burak and Fiete, 2009; Fuhs and Touretzky,  
396 2006; McNaughton et al., 2006; Ocko, 2018). In principle, both path-integration and error correction can  
397 be combined through this process.

### 398 **Cue cells in real and virtual environments**

399 Why cue cells had such stable and easily classified activity patterns in virtual reality, but not in the  
400 real arena remains an open question. Navigating along a virtual track differs greatly from foraging in a  
401 complex real arena. In the case of virtual reality, the animal encounters a single cue at a time, so the  
402 representation of location using visual information is primarily from a limited orientation to individual  
403 cues, one pair at a time, along the track. It is possible that forming a representation of location in the real

404 arena requires triangulation from many cues located at various angles and distances away. Despite the  
405 simple design of our real arena with a single cue card on one wall, there could be multimodal features  
406 from the floor, walls, or from distal cues outside of the arena. Navigation along simple virtual  
407 environments comprised of only visual cues sets up an ideal experimental paradigm to further understand  
408 the activity of these cells. Future experiments could probe other features of the cells with more  
409 perturbations of the virtual environment.

#### 410 **Cell classes in MEC**

411 Although our analysis and discussion of cue cells have largely followed the traditional approach of  
412 describing MEC cells according to discrete classes, it is interesting to note that cue scores, like grid, head  
413 direction, and border scores, each form a continuum and that a significant fraction of cells in MEC are  
414 conjunctive for more than one class (Figure 3). The conjunctive coding in neural firing in MEC is also  
415 demonstrated by a recent study (Hardcastle et al., 2017) and is conceptually analogous to the “mixed  
416 selectivity” in neural codes that have been increasingly recognized in cognitive, sensory and motor  
417 systems (Finkelstein et al., 2015; Fusi et al., 2016; Rigotti et al., 2013; Rubin et al., 2014). Recently,  
418 mixed selectivity has been demonstrated to be computationally useful in evidence integration and  
419 decision-making by allowing the selection of specific integrating modes in accumulating evidence to  
420 guide future behavior (Mante et al., 2013; Ulanovsky and Moss, 2011). Reframing this in the context of  
421 path integration, it will be useful to determine how navigation systems might use mixed selectivity and  
422 context-specific integrating modes to weigh different accumulating information (different velocity and  
423 position inputs) according to the reliability of that information during navigation in complex, feature-rich  
424 environments.

## 425 **Materials and Methods**

### 426 **Animals**

427 All procedures were approved by the Princeton University Institutional Animal Care and Use  
428 Committee and were in compliance with the Guide for the Care and Use of Laboratory Animals. Four  
429 C57BL/6J male mice, 3-6 months old, were used for electrophysiological experiments. Two 10-week old  
430 male mice were used for the two-photon imaging of layer 3 neurons. Mice used for the two-photon  
431 imaging of layer 2 neurons were six 10- to 12-week old GP5.3 males, which were heterozygous for  
432 carrying the transgene Thy1-GCaMP6f-WPRE to drive the expression of GCaMP6f (Dana et al., 2014).

### 433 **Experimental Design and Statistical Analysis**

434 All electrophysiological data are represented as mean  $\pm$  STD and imaging data are represented as  
435 mean  $\pm$  SEM, unless otherwise noted. A student's t-test was always used to evaluate whether the  
436 difference of two groups of values was statistically significant. Significance was defined using a p value  
437 threshold of 0.05 (\* p<0.05, \*\* p<0.01, \*\*\* p<0.001). All analysis was performed using custom Matlab  
438 software and built in toolkits. All correlations were Pearson correlations unless otherwise specified.

### 439 **Code Accessibility**

440 Code for all the analyses will be available upon request.

### 441 **Real arena for tetrode recording**

442 Experiments were performed as described previously (Domnisoru et al., 2013). The real arena  
443 consisted of a 0.5 m  $\times$  0.5 m square enclosure with black walls at least 30 cm high and a single white cue  
444 card on one wall. Animals foraged for small pieces of chocolate (Hershey's milk chocolate) scattered  
445 throughout the arena at random times. Trials lasted 10-20 minutes. On each recording day, real arena  
446 experiments were always performed before virtual reality experiments. Video tracking was performed as  
447 described previously (Domnisoru et al., 2013) using a Neuralynx acquisition system (Digital Lynx).  
448 Digital timing signals, which were sent and acquired using NI-DAQ cards, and controlled using ViRMEn  
449 software in Matlab (Aronov and Tank, 2014) were used to synchronize all computers.

### 450 **Virtual reality (VR)**

451 The virtual reality system was similar to those described previously (Dombeck et al., 2010;  
452 Domnisoru et al., 2013; Gauthier and Tank, 2018; Gu et al., 2018; Harvey et al., 2012; Harvey et al.,  
453 2009; Low et al., 2014). ViRMEn software (Aronov and Tank, 2014) was used to design the linear VR  
454 environment, control the projection of the virtual world onto the toroidal screen, deliver water rewards (4  
455  $\mu$ l) through the control of a solenoid valve, and monitor running velocity of the mice. Upon running to the  
456 end of the track, mice were teleported back to the beginning of the track.

457 *VR for tetrode recording:* The animal ran on a cylindrical treadmill, and the rotational velocity of the  
458 treadmill, which was proportional to mouse velocity, was measured using sequential sampling of an  
459 angular encoder (US Digital) on each ViRMEn iteration (~60 iterations per second). The tracks were 8  
460 meters long with identical cues on both side of the track.

461 *VR for imaging:* Mice ran on an air-supported spherical treadmill, which only rotated in the  
462 forward/backward direction. Their heads were held fixed under a two-photon microscope (Gu et al., 2018;  
463 Low et al., 2014). The motion of the ball was measured using an optical motion sensor (ADNS3080; red  
464 LED illumination) controlled with an Arduino Due. The VR environment was rendered in blue and

465 projected through a blue filter (Edmund Optics 54-462). The track was 18 meters long with asymmetric  
466 cues on two sides of the track. Water rewards (4  $\mu$ l) were delivered at the beginning and the end of the  
467 track.

#### 468 **Microdrives and electrode recording system**

469 Custom microdrives and the electrophysiology recording system used were similar to those described  
470 previously (Aronov and Tank, 2014; Domnisoru et al., 2013; Kloosterman et al., 2009). Tetrodes were  
471 made of PtIr (18 micron, California Fine Wire) and plated using Platinum Black (Neuralynx) to 100-150  
472 k $\Omega$  at 1 kHz. A reference wire (0.004" coated PtIr, 0.002" uncoated 300  $\mu$ m top) was inserted into the  
473 brain medial to the MEC on each side, and a ground screw or wire was implanted near the midline over  
474 the cerebellum.

475 The headstage design was identical to the one used previously (Aronov and Tank, 2014) with the  
476 addition of solder pads to power two LEDs for use in tracking animal location and head orientation.  
477 Custom electrode interface boards (EIBs) were also designed to fit within miniature custom microdrives.  
478 A lightweight 9-wire cable (Omnetics) connected the headstage to an interface board. The cable was long  
479 enough (~3m) to accommodate the moving of the animal between the real arena and the virtual reality  
480 system without disconnection.

#### 481 **Surgery**

482 *Tetrode recording:* Surgery was performed using aseptic techniques, similar to those described  
483 previously (Domnisoru et al., 2013). The headplate and microdrive were implanted in a single surgery  
484 that lasted no longer than 3 hours. Bilateral craniotomies were performed with a dental drill at 3.2 mm  
485 lateral of the midline and just rostral to the lambdoid suture. After the microdrive implantation, 4-6 turns  
486 were slowly made on each drive screw, lowering the tetrodes at least 1 mm into the brain. Animals woke  
487 up within ~10 minutes after the anesthesia was removed and were then able to move around and lift their  
488 heads.

489 *Imaging:* The surgical procedures were similar to those described previously (Low et al., 2014). A  
490 microprism implant was composed of a right angle microprism (1.5 mm side length, BK7 glass,  
491 hypotenuse coated with aluminum; Optosigma), a circular coverslip (3.0 mm diameter, #1 thickness, BK7  
492 glass; Warner Instruments) and a thin metal cylinder (304 stainless steel, 0.8 mm height, 3.0 mm outer  
493 diameter, 2.8 mm inner diameter; MicroGroup) bonded together using UV-curing optical adhesive  
494 (Norland #81). The microprism implantation was always performed in the left hemisphere (Gu et al.,  
495 2018; Low et al., 2014). A circular craniotomy (3 mm diameter) was centered 3.4 mm lateral to the  
496 midline and 0.75 mm posterior to the center of the transverse sinus (at 3.4 mm lateral). The dura over the  
497 cerebellum was removed. The microprism assembly was manually implanted, with the prism inserted into  
498 the subdural space within the transverse fissure. The implant was bonded to the skull using Vetbond (3M)  
499 and Metabond (Parkell). A titanium headplate with a single flange was bonded to the skull on the side  
500 opposite to the side of the craniotomy using Metabond. For imaging layer 3 neurons in the MEC,  
501 AAV1.hSyn.GCaMP6f.WPRE.SV40 (Penn Vector Core) virus was diluted 1:4 in a solution of 20% (w/v)  
502 mannitol in PBS and pressure injected at two sites (200 nl/site): (1) ML 3.00 mm, AP 0.77 mm, depth  
503 1.79 mm; (2) ML 3.36 mm, AP 0.60 mm, depth 1.42 mm.

## 504 **Two-photon imaging during virtual navigation**

505 Imaging was performed using a custom-built, VR-compatible two-photon microscope (Low et al.,  
506 2014) with a rotatable objective. The 920 nm excitation laser was delivered by a mode-locked Ti:sapphire  
507 laser (Chameleon Ultra II, Coherent, 140fs pulses at 80 MHz). The laser scanning for imaging layer 2  
508 neurons of the MEC was achieved by a resonant scanning mirror (Cambridge Tech.). The laser scanning  
509 for imaging layer 3 neurons of the MEC was achieved by a galvanometer XY scanner (Cambridge Tech.).  
510 Fluorescence of GCaMP6f was isolated using a bandpass emission filter (542/50 nm, Semrock) and  
511 detected using GaAsP photomultiplier tubes (1077PA-40, Hamamatsu). The two objectives used for  
512 imaging layers 2 and 3 were Olympus 40 $\times$ , 0.8 NA (water) and Olympus LUCPLFLN 40 $\times$ , 0.6 NA (air),  
513 respectively. Ultrasound transmission gel (Sonigel, refractive index: 1.3359 (Larson et al., 2011); Mettler  
514 Electronics) was used as the immersion medium for the water immersion objective used for layer 2  
515 imaging. The optical axes of the microscope objective and microprism were aligned at the beginning of  
516 each experiment as described previously (Low et al., 2014). Microscope control and image acquisition  
517 were performed using ScanImage software (layer 2 imaging: v5; layer 3 imaging: v3.8; Vidrio  
518 Technologies (Pologruto et al., 2003)). Images were acquired at 30 Hz at a resolution of 512 x 512 pixels  
519 (~410 x 410  $\mu$ m FOV) for layer 2 imaging, and 13 Hz at a resolution of 64 x 256 pixels (~100 x 360  $\mu$ m  
520 FOV) for layer 3 imaging. Imaging and behavioral data were synchronized by simultaneously recording  
521 the voltage command signal to the galvanometer together with behavioral data from the VR system at a  
522 sampling rate of 1 kHz, using a Digidata/Clampex acquisition system (Molecular Devices).

## 523 **Histology**

524 *For tetrode recording:* To identify tetrode locations, small lesions were made by passing anodal  
525 current (15  $\mu$ A, 1 sec) through one wire on each tetrode. Animals were then given an overdose of  
526 Ketamine (200 mg/kg)/Xylazine (20 mg/kg) and perfused transcardially with 4% formaldehyde in 1X  
527 PBS. At the end of perfusion, the microdrive/headplate assembly was carefully detached from the animal.  
528 The brain was harvested and placed in 4% formaldehyde in 1X PBS for a day and then transferred to 1X  
529 PBS. To locate tetrode tracks and lesion sites, the brain was embedded in 4% agarose and sliced in 80  $\mu$ m  
530 thick sagittal sections. Slices were stained with a fluorescent Nissl stain (NeuroTrace, Molecular Probes),  
531 and images were acquired on an epifluorescence microscope (Leica) and later compared with the mouse  
532 brain atlas (Paxinos). To identify which tetrode track belonged to each tetrode of the microdrive, the  
533 microdrive/headplate assembly was observed with a microscope to determine the location of each tetrode  
534 in the cannula, the relative lengths of the tetrodes, and whether the tetrodes were parallel or twisted. If  
535 tetrodes were twisted, then recordings were used only if grid cells were found on the tetrode.

536 *For imaging:* For verifying the layer-specific expression of GCaMP6f in the MEC, animals were  
537 transcardially perfused, as described above, and their brains were sliced in 100  $\mu$ m thick sagittal sections.  
538 A fluorescent Nissl stain was performed as described above.

## 539 **General data processing for tetrode recording**

540 Data analysis was performed offline using custom Matlab code. Electrophysiology data were first  
541 demultiplexed and filtered (500 Hz highpass). Spikes were then detected using a negative threshold set to  
542 three times the standard deviation of the signal averaged across electrodes on the same tetrodes.  
543 Waveforms were extracted and features were then calculated. These features included the baseline-to-

544 peak amplitudes of the waveforms on each of the tetrode wires as well as the top three principal  
545 components calculated from a concatenation of the waveforms from all wires.

546 *Cluster separation:* Features of the waveforms were plotted with a custom Matlab GUI. Criteria for  
547 eliminating clusters from the dataset were: units with less than 100 spikes (in real arena or virtual tracks),  
548 the minimum spatial firing rate along the virtual track  $> 10$  Hz or the maximum firing rate  $> 50$  Hz. After  
549 this, 2825 clusters remained. Since clusters were cut with two different methods (using all 4 electrodes  
550 and using 3 electrodes with the fourth subtracted as a reference), repeats needed to be removed from the  
551 overall dataset. Repeats were found using a combination of 3 measures: the Pearson correlation of the real  
552 arena spatial firing rate, the same correlation of the virtual track spatial firing rate and the ISI distribution  
553 of the spikes merged between the two clusters. If the sum of these scores exceeded 2.25 then the clusters  
554 were considered to be from the same cell; the cluster with the larger number of spikes was kept, and the  
555 other cluster was discarded.

556 Recordings were performed on four animals over two months. From these recordings, 5940 clusters  
557 were manually cut using a custom Matlab GUI. Of these, there were 1081 clusters that were identified on  
558 tetrodes that were histologically identified to be in MEC during the recording that also passed our cluster  
559 quality criteria. The grid scores of these cells were calculated and a grid score threshold was calculated  
560 using shuffled permutations of these cells (Aronov and Tank, 2014; Domnisoru et al., 2013). Any tetrode  
561 on a particular day with a grid cell was then added to the database from that date on. The final database  
562 contained 1590 clusters.

### 563 **Spatial firing rates of tetrode data**

564 Position data (including head orientation in real 2D arenas) were subsampled at 50 Hz and spikes  
565 were assigned into the corresponding 0.02 sec bins. Velocity was calculated by smoothing the  
566 instantaneous velocity with a moving boxcar window of 1 second. Only data in which the animal's  
567 smoothed velocity exceeded 1 cm/sec were used for further analyses of firing rates or scores.

568 *Real arena spatial firing rate:* 2D arenas were divided into 2.5x2.5 cm bins. Spike counts and the  
569 total amount of times spent in these bins were convolved with a Gaussian window (5x5 bins,  $\sigma = 1$  bin).  
570 Firing rate was not defined for spatial bins visited for a total of less than 0.3 seconds.

571 *Real arena, head direction:* The animal's head direction was binned in 3-degree intervals. For each  
572 angle bin, the spike count and the total amount of time spent (occupancy) was calculated. These values  
573 were separately smoothed with a 15 degree (5 bins) boxcar window, and the firing rate was computed as  
574 the ratio of the smoothed spike count to the smoothed occupancy.

575 *Virtual track spatial firing rate:* Virtual tracks were divided into 5 cm bins. Spike counts and the  
576 amount of time spent in these bins were smoothed independently with a Gaussian window (3 point,  $\sigma =$   
577 1). The smoothed firing rate was calculated as the smoothed spike position distribution divided by the  
578 smoothed overall position distribution.

579 *Spatial firing fields:* To calculate spatial firing fields we created time arrays for position and for  
580 number of spikes of a cell. Time bins were 100 msec. For position, we calculated the average position  
581 within each chunk of time (5 data points since data were interpolated to 20 msec sampling intervals). We  
582 then divided the spatial track into 5 cm bins and determined in which bin the average position was  
583 located. For spikes, we counted the number of spikes in that 100 msec interval. This generated two arrays



584 in time (sampled at 100 msec), one with spike count and one with spatial bin location along the track. We  
585 then circularly permuted the spike count array by a random time interval between 0.05 x recording length  
586 and 0.95 x recording length. We then calculated the smoothed firing rate of this shuffled spike time array  
587 with the spatial bin location array. This was repeated 100 times, and the shuffled spatial firing rate was  
588 calculated for each permutation. The p-value was defined for each spatial bin along the track as the  
589 fraction of permutations on which the firing rate in that bin was above the actual firing rate. Any bin in  
590 which the p-value was less than 0.3 was considered part of a firing field.

591 *Firing field distributions:* For each cue cell, we define an array (5 cm bins) that is 1 when there is a  
592 firing field and 0 otherwise. To look at the distribution of firing fields for the population of cells, we sum  
593 the values for each bin across all cue cells and divide by the number of cells. This gives the fraction of  
594 cue cells with firing fields at each location. The plot of this fraction versus location was defined as the  
595 population firing field distribution.

#### 596 **Scores for cells in tetrode data**

597 For all scores below, 400 shuffles were performed with spike times circularly permuted by a random  
598 amount of time chosen between 0.5 x recording length and 0.95 x recording length, a standard method for  
599 determining score thresholds (Domnisoru et al., 2013). Shuffled distributions from all units combined  
600 were used to calculate a threshold at 95th percentile.

601 *Grid score:* The unbiased autocorrelation of the 2D firing rate in a real arena was first calculated  
602 (Hafting et al., 2005). Starting from the center of the 2D autocorrelation function, an inner radius was  
603 defined as the smallest radius of three different values: local minimum of the radial autocorrelation;  
604 where the autocorrelation was negative; or at 10 cm. Multiple outer radii were used from the inner radius  
605 + 4 bins to the size of the autocorrelation - 4 bins in steps of 1 bin. For each of these outer radii, an  
606 annulus was defined between the inner and the outer annulus. We then computed the Pearson correlation  
607 between each of these annuli and its rotation in 30 degree intervals from 30 to 150 degrees. For each  
608 annulus we then calculated the difference between the maximum of all 60 and 120 rotation correlations  
609 and the minimum of all 30, 90, and 150 degree correlations. The grid score was defined to be the  
610 maximum of all of these values across all annuli.

611 *Head direction score:* The head direction score was defined to be the mean vector length of the head  
612 direction firing rate (Giocomo et al., 2014). The head direction angle was defined to be the orientation of  
613 the mean vector of the head direction firing rate.

614 *Spatial/head direction stability:* This was calculated as described previously (Boccaro et al., 2010).  
615 Recording sessions were divided into two parts, the firing rate was calculated for each, and the spatial  
616 stability was defined as the Pearson correlation between the two parts.

617 *Cue score:* The cue score was developed to measure the correlation of the spatial firing rate to the  
618 visual cues of the environment. A “cue template” was defined in 5 cm bins with value equal to 1 for bins  
619 that included the area between the front and back edges of each cue and 0 elsewhere. The cross  
620 correlation between the cue template and the firing rate was first calculated (relative shift  $\leq$  300 cm).  
621 The peak in the cross correlation with the smallest absolute shift from zero was chosen as the best  
622 correlation of the firing rate to the cue template. The spatial shift at which this peak occurred was then  
623 used to displace the cue template to best align with the firing rate. The correlation was then calculated

624 locally for each cue. The local window included the cue and regions on either side extending by half of  
625 the cue width. The mean of local correlation values across all cues was calculated and defined as the “cue  
626 score”. An illustration of this method is shown in Figure 1B. This score effectively distinguished grid  
627 cells from cue cells, because grid cells generally did not have peaks at consistent locations relative to all  
628 the cues. The small number of grid cells that passed the cue score shuffle test also tended to have activity  
629 in other locations, where cues were not present.

630 *Ridge/background ratio:* The ridge/background ratio was calculated on the smoothed spatial firing  
631 rate at each cue location. The spatial firing rate of each cell was shifted to maximally align to the cue  
632 template as was done to calculate the cue score. The 5 bins (25 cm) in the center of each cue location are  
633 defined to be bins for the ridge. Background bins were all bins outside of cue locations displaced in both  
634 directions by [cue half-width + 20] to [cue half-width + 30]. For each cue, the ridge/background ratio was  
635 calculated as the mean firing rate in the ridge bins divided by the mean firing rate in the background bins.  
636 The ridge/background ratio for the cell was defined to be the mean of these individual ridge/background  
637 ratios. We performed 1000 shuffles of the data, as described above, and calculated the mean  
638 ridge/background ratio for each shuffle. The p value is the (number of shuffled data mean values larger  
639 than the mean ridge/background ratio of the data)/(number of shuffled data mean values less than the  
640 mean ridge/background ratio of the data).

#### 641 **General imaging data processing**

642 All imaging data were motion corrected using a whole-frame, cross-correlation-based method  
643 (Dombeck et al., 2010) and were then used to identify regions of interest (ROIs) using an independent  
644 component analysis (ICA) based algorithm (Mukamel et al., 2009) (for individual layer 3 field of view  
645 (FOV):  $\mu = 1$ , 150 principal components, 150 independent components, s.d. threshold = 3; for  
646 individual layer 2 FOV, which was evenly split as nine blocks before ICA:  $\mu = 0.7$ , 30 principal  
647 components, 150 independent components, s.d. threshold = 3). Fluorescence time series of these ROIs  
648 were extracted from all motion-corrected stacks. The fractional change in fluorescence with respect to  
649 baseline ( $\Delta F/F$ ) was calculated as  $(F(t) - F_0(t)) / F_0(t)$ , similar to what was described previously (Gu et al.,  
650 2018; Low et al., 2014). Significant calcium transients were identified as those that exceeded cell-specific  
651 amplitude/duration thresholds (so that artefactual fluctuations were expected to account for less than 1%  
652 of detected transients (Dombeck et al., 2007)). Mean  $\Delta F/F$  of the whole imaging session or individual  
653 traversals was calculated as a function of position along the virtual track for non-overlapping 5 cm bins.  
654 Only data points during which the mouse's running speed met or exceeded 1 cm/s were used for the  
655 calculation.

#### 656 **Identifying cue cells in imaging data**

657 *Selection of cells:* candidates for cue cells were restricted to cells that contained at least one in-field  
658 period and one out-of-field period based on a p-value analysis of their calcium responses (Domnisoru et  
659 al., 2013; Gu et al., 2018; Heys et al., 2014; Yoon et al., 2016). Similar to identifying spatial fields for  
660 tetrode-recorded cells, in- and out-of-field periods were defined by comparing the mean  $\Delta F/F$  value in  
661 each 5 cm bin to that of a random distribution created by 1000 bootstrapped shuffled responses, which  
662 were generated by rotating the  $\Delta F/F$  trace starting from random sample numbers between  $0.05 \times N_{\text{samples}}$   
663 and  $0.95 \times N_{\text{samples}}$  ( $N_{\text{samples}}$ : number of samples in the  $\Delta F/F$  trace). For each bin, the p-value equaled the

664 percent of shuffled mean  $\Delta F/F$  that were above the real mean  $\Delta F/F$ . In-field-periods were defined as three  
665 or more adjacent bins (except at the beginning and end of the track where two adjacent bins were  
666 sufficient) whose p-value  $\leq 0.2$  and for which at least 10% of the runs contained significant calcium  
667 transients within the period. Out-of-field periods were defined as two or more bins whose p-value  $\geq 0.75$ .

668 *Defining cue cells responding to left, right, and both-side cues:* Three types of cue template were  
669 generated: left, right, and both side cue templates corresponded to cues localized on the left, right, and  
670 both sides of the track, respectively. Three cue scores for each cell were calculated as described above  
671 according to the three types of template. The highest score and its corresponding side were used as the  
672 cue score and side preference for that cell, respectively. The cue score of a cell was further compared to  
673 those of bootstrapped shuffled responses (200 shuffles for each cell, generated as described above). Cue  
674 scores of all shuffles from all cells to all types of cue templates were combined together. If the cue score  
675 of a cell exceeded the 95<sup>th</sup> percentile of the shuffled scores, the cell was a cue cell responding to cues with  
676 that side preference.

677 **Acknowledgements:** We thank current and former members of the Tank lab, Ila Fiete, and Anika  
678 Kinkhabwala for helpful discussions, and Jeffrey Santner and Alexander Riordan for comments on the  
679 manuscript. This work was supported by NINDS Grant 5R37NS081242 (D.W.T), NIMH Grant  
680 5R01MH083686 (D.W.T), NIH Postdoctoral Fellowship Grant F32NS070514-01A1 (A.A.K).

681

682

683 **Competing interests:** The authors declare no competing interests.

684 **References**

- 685 Aronov, D., and Tank, D.W. (2014). Engagement of neural circuits underlying 2D spatial navigation in a  
686 rodent virtual reality system. *Neuron* 84, 442-456.
- 687 Barry, C., and Burgess, N. (2014). Neural mechanisms of self-location. *Curr Biol* 24, R330-339.
- 688 Boccara, C.N., Sargolini, F., Thoresen, V.H., Solstad, T., Witter, M.P., Moser, E.I., and Moser, M.B.  
689 (2010). Grid cells in pre- and parasubiculum. *Nat Neurosci* 13, 987-994.
- 690 Brun, V.H., Leutgeb, S., Wu, H.Q., Schwarcz, R., Witter, M.P., Moser, E.I., and Moser, M.B. (2008).  
691 Impaired spatial representation in CA1 after lesion of direct input from entorhinal cortex. *Neuron* 57, 290-  
692 302.
- 693 Burak, Y., and Fiete, I.R. (2009). Accurate path integration in continuous attractor network models of grid  
694 cells. *PLoS Comput Biol* 5, e1000291.
- 695 Bush, D., Barry, C., Manson, D., and Burgess, N. (2015). Using Grid Cells for Navigation. *Neuron* 87,  
696 507-520.
- 697 Calton, J.L., Stackman, R.W., Goodridge, J.P., Archey, W.B., Dudchenko, P.A., and Taube, J.S. (2003).  
698 Hippocampal place cell instability after lesions of the head direction cell network. *J Neurosci* 23, 9719-  
699 9731.
- 700 Calton, J.L., Turner, C.S., Cyrenne, D.L., Lee, B.R., and Taube, J.S. (2008). Landmark control and  
701 updating of self-movement cues are largely maintained in head direction cells after lesions of the  
702 posterior parietal cortex. *Behav Neurosci* 122, 827-840.
- 703 Campbell, M.G., Ocko, S.A., Mallory, C.S., Low, I.I.C., Ganguli, S., and Giocomo, L.M. (2018).  
704 Principles governing the integration of landmark and self-motion cues in entorhinal cortical codes for  
705 navigation. *Nat Neurosci* 21, 1096-1106.
- 706 Carpenter, F., Manson, D., Jeffery, K., Burgess, N., and Barry, C. (2015). Grid cells form a global  
707 representation of connected environments. *Current biology : CB* 25, 1176-1182.
- 708 Chen, G., Manson, D., Cacucci, F., and Wills, T.J. (2016). Absence of Visual Input Results in the  
709 Disruption of Grid Cell Firing in the Mouse. *Curr Biol* 26, 2335-2342.
- 710 Clark, B.J., Bassett, J.P., Wang, S.S., and Taube, J.S. (2010). Impaired head direction cell representation  
711 in the anterodorsal thalamus after lesions of the retrosplenial cortex. *J Neurosci* 30, 5289-5302.
- 712 Clark, B.J., Rice, J.P., Akers, K.G., Candelaria-Cook, F.T., Taube, J.S., and Hamilton, D.A. (2013).  
713 Lesions of the dorsal tegmental nuclei disrupt control of navigation by distal landmarks in cued,  
714 directional, and place variants of the Morris water task. *Behav Neurosci* 127, 566-581.
- 715 Clark, B.J., Sarma, A., and Taube, J.S. (2009). Head direction cell instability in the anterior dorsal  
716 thalamus after lesions of the interpeduncular nucleus. *J Neurosci* 29, 493-507.
- 717 Clark, B.J., and Taube, J.S. (2009). Deficits in landmark navigation and path integration after lesions of  
718 the interpeduncular nucleus. *Behav Neurosci* 123, 490-503.
- 719 Dana, H., Chen, T.W., Hu, A., Shields, B.C., Guo, C., Looger, L.L., Kim, D.S., and Svoboda, K. (2014).  
720 Thy1-GCaMP6 transgenic mice for neuronal population imaging in vivo. *PLoS One* 9, e108697.
- 721 Derdikman, D., Whitlock, J.R., Tsao, A., Fyhn, M., Hafting, T., Moser, M.B., and Moser, E.I. (2009).  
722 Fragmentation of grid cell maps in a multicompartiment environment. *Nat Neurosci* 12, 1325-1332.

- 723 Diehl, G.W., Hon, O.J., Leutgeb, S., and Leutgeb, J.K. (2017). Grid and Nongrid Cells in Medial  
724 Entorhinal Cortex Represent Spatial Location and Environmental Features with Complementary Coding  
725 Schemes. *Neuron* 94, 83-92 e86.
- 726 Dombeck, D.A., Harvey, C.D., Tian, L., Looger, L.L., and Tank, D.W. (2010). Functional imaging of  
727 hippocampal place cells at cellular resolution during virtual navigation. *Nat Neurosci* 13, 1433-1440.
- 728 Dombeck, D.A., Khabbaza, A.N., Collman, F., Adelman, T.L., and Tank, D.W. (2007). Imaging large-  
729 scale neural activity with cellular resolution in awake, mobile mice. *Neuron* 56, 43-57.
- 730 Domnisoru, C., Kinkhabwala, A.A., and Tank, D.W. (2013). Membrane potential dynamics of grid cells.  
731 *Nature* 495, 199-204.
- 732 Erskine, L., and Herrera, E. (2014). Connecting the retina to the brain. *ASN Neuro* 6.
- 733 Evans, T., Bicanski, A., Bush, D., and Burgess, N. (2016). How environment and self-motion combine in  
734 neural representations of space. *J Physiol* 594, 6535-6546.
- 735 Finkelstein, A., Derdikman, D., Rubin, A., Foerster, J.N., Las, L., and Ulanovsky, N. (2015). Three-  
736 dimensional head-direction coding in the bat brain. *Nature* 517, 159-164.
- 737 Frohardt, R.J., Bassett, J.P., and Taube, J.S. (2006). Path integration and lesions within the head direction  
738 cell circuit: comparison between the roles of the anterodorsal thalamus and dorsal tegmental nucleus.  
739 *Behav Neurosci* 120, 135-149.
- 740 Fuhs, M.C., and Touretzky, D.S. (2006). A spin glass model of path integration in rat medial entorhinal  
741 cortex. *J Neurosci* 26, 4266-4276.
- 742 Fusi, S., Miller, E.K., and Rigotti, M. (2016). Why neurons mix: high dimensionality for higher  
743 cognition. *Curr Opin Neurobiol* 37, 66-74.
- 744 Fyhn, M., Hafting, T., Treves, A., Moser, M.B., and Moser, E.I. (2007). Hippocampal remapping and grid  
745 realignment in entorhinal cortex. *Nature* 446, 190-194.
- 746 Gauthier, J.L., and Tank, D.W. (2018). A Dedicated Population for Reward Coding in the Hippocampus.  
747 *Neuron* 99, 179-193 e177.
- 748 Geva-Sagiv, M., Las, L., Yovel, Y., and Ulanovsky, N. (2015). Spatial cognition in bats and rats: from  
749 sensory acquisition to multiscale maps and navigation. *Nat Rev Neurosci* 16, 94-108.
- 750 Giocomo, L.M. (2016). Environmental boundaries as a mechanism for correcting and anchoring spatial  
751 maps. *J Physiol* 594, 6501-6511.
- 752 Giocomo, L.M., Stensola, T., Bonnevie, T., Van Cauter, T., Moser, M.B., and Moser, E.I. (2014).  
753 Topography of head direction cells in medial entorhinal cortex. *Curr Biol* 24, 252-262.
- 754 Golob, E.J., and Taube, J.S. (1999). Head direction cells in rats with hippocampal or overlying  
755 neocortical lesions: evidence for impaired angular path integration. *J Neurosci* 19, 7198-7211.
- 756 Golob, E.J., Wolk, D.A., and Taube, J.S. (1998). Recordings of postsubiculum head direction cells  
757 following lesions of the laterodorsal thalamic nucleus. *Brain Res* 780, 9-19.
- 758 Gu, Y., Lewallen, S., Kinkhabwala, A.A., Domnisoru, C., Yoon, K., Gauthier, J.L., Fiete, I.R., and Tank,  
759 D.W. (2018). A Map-like Micro-Organization of Grid Cells in the Medial Entorhinal Cortex. *Cell* 175,  
760 736-750 e730.
- 761 Hafting, T., Fyhn, M., Molden, S., Moser, M.B., and Moser, E.I. (2005). Microstructure of a spatial map  
762 in the entorhinal cortex. *Nature* 436, 801-806.

- 763 Hardcastle, K., Ganguli, S., and Giocomo, L.M. (2015). Environmental boundaries as an error correction  
764 mechanism for grid cells. *Neuron* 86, 827-839.
- 765 Hardcastle, K., Maheswaranathan, N., Ganguli, S., and Giocomo, L.M. (2017). A Multiplexed,  
766 Heterogeneous, and Adaptive Code for Navigation in Medial Entorhinal Cortex. *Neuron* 94, 375-387  
767 e377.
- 768 Harvey, C.D., Coen, P., and Tank, D.W. (2012). Choice-specific sequences in parietal cortex during a  
769 virtual-navigation decision task. *Nature* 484, 62-68.
- 770 Harvey, C.D., Collman, F., Dombeck, D.A., and Tank, D.W. (2009). Intracellular dynamics of  
771 hippocampal place cells during virtual navigation. *Nature* 461, 941-946.
- 772 Heys, J.G., Rangarajan, K.V., and Dombeck, D.A. (2014). The functional micro-organization of grid cells  
773 revealed by cellular-resolution imaging. *Neuron* 84, 1079-1090.
- 774 Hollup, S.A., Kjelstrup, K.G., Hoff, J., Moser, M.B., and Moser, E.I. (2001). Impaired recognition of the  
775 goal location during spatial navigation in rats with hippocampal lesions. *J Neurosci* 21, 4505-4513.
- 776 Hopfield, J.J. (2015). Understanding Emergent Dynamics: Using a Collective Activity Coordinate of a  
777 Neural Network to Recognize Time-Varying Patterns. *Neural Comput* 27, 2011-2038.
- 778 Hoydal, O.A.S., E. R.; Moser M. B.; Moser E. I. (2018). Object-vector coding in the medial entorhinal  
779 cortex. bioRxiv.
- 780 Kinkhabwala, A.A., Aronov, D., Tank, D. W. (2015). Visual cue-related activity of MEC cells during  
781 navigation in virtual reality In Society for Neuroscience (Chicago).
- 782 Kloosterman, F., Davidson, T.J., Gomperts, S.N., Layton, S.P., Hale, G., Nguyen, D.P., and Wilson, M.A.  
783 (2009). Micro-drive array for chronic in vivo recording: drive fabrication. *J Vis Exp*.
- 784 Kropff, E., Carmichael, J.E., Moser, M.B., and Moser, E.I. (2015). Speed cells in the medial entorhinal  
785 cortex. *Nature* 523, 419-424.
- 786 Krupic, J., Bauza, M., Burton, S., Barry, C., and O'Keefe, J. (2015). Grid cell symmetry is shaped by  
787 environmental geometry. *Nature* 518, 232-235.
- 788 Krupic, J., Bauza, M., Burton, S., and O'Keefe, J. (2018). Local transformations of the hippocampal  
789 cognitive map. *Science* 359, 1143-1146.
- 790 Larson, B., Abeytunge, S., and Rajadhyaksha, M. (2011). Performance of full-pupil line-scanning  
791 reflectance confocal microscopy in human skin and oral mucosa in vivo. *Biomed Opt Express* 2, 2055-  
792 2067.
- 793 Lever, C., Burton, S., Jeewajee, A., O'Keefe, J., and Burgess, N. (2009). Boundary vector cells in the  
794 subiculum of the hippocampal formation. *J Neurosci* 29, 9771-9777.
- 795 Low, R.J., Gu, Y., and Tank, D.W. (2014). Cellular resolution optical access to brain regions in fissures:  
796 imaging medial prefrontal cortex and grid cells in entorhinal cortex. *Proc Natl Acad Sci U S A* 111,  
797 18739-18744.
- 798 Mante, V., Sussillo, D., Shenoy, K.V., and Newsome, W.T. (2013). Context-dependent computation by  
799 recurrent dynamics in prefrontal cortex. *Nature* 503, 78-84.
- 800 McNaughton, B.L., Battaglia, F.P., Jensen, O., Moser, E.I., and Moser, M.B. (2006). Path integration and  
801 the neural basis of the 'cognitive map'. *Nat Rev Neurosci* 7, 663-678.
- 802 Mittelstaedt, H.a.M., M.-l. (1982). *Homing by path integration* (Springer, Berlin, Heidelberg).

803 Moser, E., Moser, M.B., and Andersen, P. (1993). Spatial learning impairment parallels the magnitude of  
804 dorsal hippocampal lesions, but is hardly present following ventral lesions. *J Neurosci* *13*, 3916-3925.

805 Mukamel, E.A., Nimmerjahn, A., and Schnitzer, M.J. (2009). Automated analysis of cellular signals from  
806 large-scale calcium imaging data. *Neuron* *63*, 747-760.

807 Ocko, S.H., K.; Giocomo, L.; Ganguli, S. (2018). Emergent elasticity in the neural code for space.  
808 bioRxiv.

809 Olsen, G.M., Ohara, S., Iijima, T., and Witter, M.P. (2017). Parahippocampal and retrosplenial  
810 connections of rat posterior parietal cortex. *Hippocampus* *27*, 335-358.

811 Parron, C., Poucet, B., and Save, E. (2004). Entorhinal cortex lesions impair the use of distal but not  
812 proximal landmarks during place navigation in the rat. *Behav Brain Res* *154*, 345-352.

813 Parron, C., and Save, E. (2004). Comparison of the effects of entorhinal and retrosplenial cortical lesions  
814 on habituation, reaction to spatial and non-spatial changes during object exploration in the rat. *Neurobiol*  
815 *Learn Mem* *82*, 1-11.

816 Perez-Escobar, J.A., Kornienko, O., Latuske, P., Kohler, L., and Allen, K. (2016). Visual landmarks  
817 sharpen grid cell metric and confer context specificity to neurons of the medial entorhinal cortex. *Elife* *5*.

818 Pollock, E.D., N.; Wei, X.; Balasubramanian, V. (2018). Dynamic self-organized error-correction of grid  
819 cells by border cells. bioRxiv.

820 Pologruto, T.A., Sabatini, B.L., and Svoboda, K. (2003). ScanImage: flexible software for operating laser  
821 scanning microscopes. *Biomedical engineering online* *2*, 13.

822 Rigotti, M., Barak, O., Warden, M.R., Wang, X.J., Daw, N.D., Miller, E.K., and Fusi, S. (2013). The  
823 importance of mixed selectivity in complex cognitive tasks. *Nature* *497*, 585-590.

824 Rubin, A., Yartsev, M.M., and Ulanovsky, N. (2014). Encoding of head direction by hippocampal place  
825 cells in bats. *J Neurosci* *34*, 1067-1080.

826 Solstad, T., Boccara, C.N., Kropff, E., Moser, M.B., and Moser, E.I. (2008). Representation of geometric  
827 borders in the entorhinal cortex. *Science* *322*, 1865-1868.

828 Stensola, T., Stensola, H., Moser, M.B., and Moser, E.I. (2015). Shearing-induced asymmetry in  
829 entorhinal grid cells. *Nature* *518*, 207-212.

830 Stewart, S., Jeewajee, A., Wills, T.J., Burgess, N., and Lever, C. (2014). Boundary coding in the rat  
831 subiculum. *Philos Trans R Soc Lond B Biol Sci* *369*, 20120514.

832 Taube, J.S., Kesslak, J.P., and Cotman, C.W. (1992). Lesions of the rat postsubiculum impair  
833 performance on spatial tasks. *Behav Neural Biol* *57*, 131-143.

834 Tsoar, A., Nathan, R., Bartan, Y., Vyssotski, A., Dell'Omo, G., and Ulanovsky, N. (2011). Large-scale  
835 navigational map in a mammal. *Proc Natl Acad Sci U S A* *108*, E718-724.

836 Ulanovsky, N., and Moss, C.F. (2011). Dynamics of hippocampal spatial representation in echolocating  
837 bats. *Hippocampus* *21*, 150-161.

838 Whitlock, J.R., Sutherland, R.J., Witter, M.P., Moser, M.B., and Moser, E.I. (2008). Navigating from  
839 hippocampus to parietal cortex. *Proc Natl Acad Sci U S A* *105*, 14755-14762.

840 Yamahachi, H., Moser, M.B., and Moser, E.I. (2013). Map fragmentation in two- and three-dimensional  
841 environments. *Behav Brain Sci* *36*, 569-571; discussion 571-587.



842 Yoon, K., Buice, M.A., Barry, C., Hayman, R., Burgess, N., and Fiete, I.R. (2013). Specific evidence of  
843 low-dimensional continuous attractor dynamics in grid cells. *Nat Neurosci* 16, 1077-1084.

844 Yoon, K., Lewallen, S., Kinkhabwala, A.A., Tank, D.W., and Fiete, I.R. (2016). Grid Cell Responses in  
845 1D Environments Assessed as Slices through a 2D Lattice. *Neuron* 89, 1086-1099.

846

847 **Figures and figure legends**

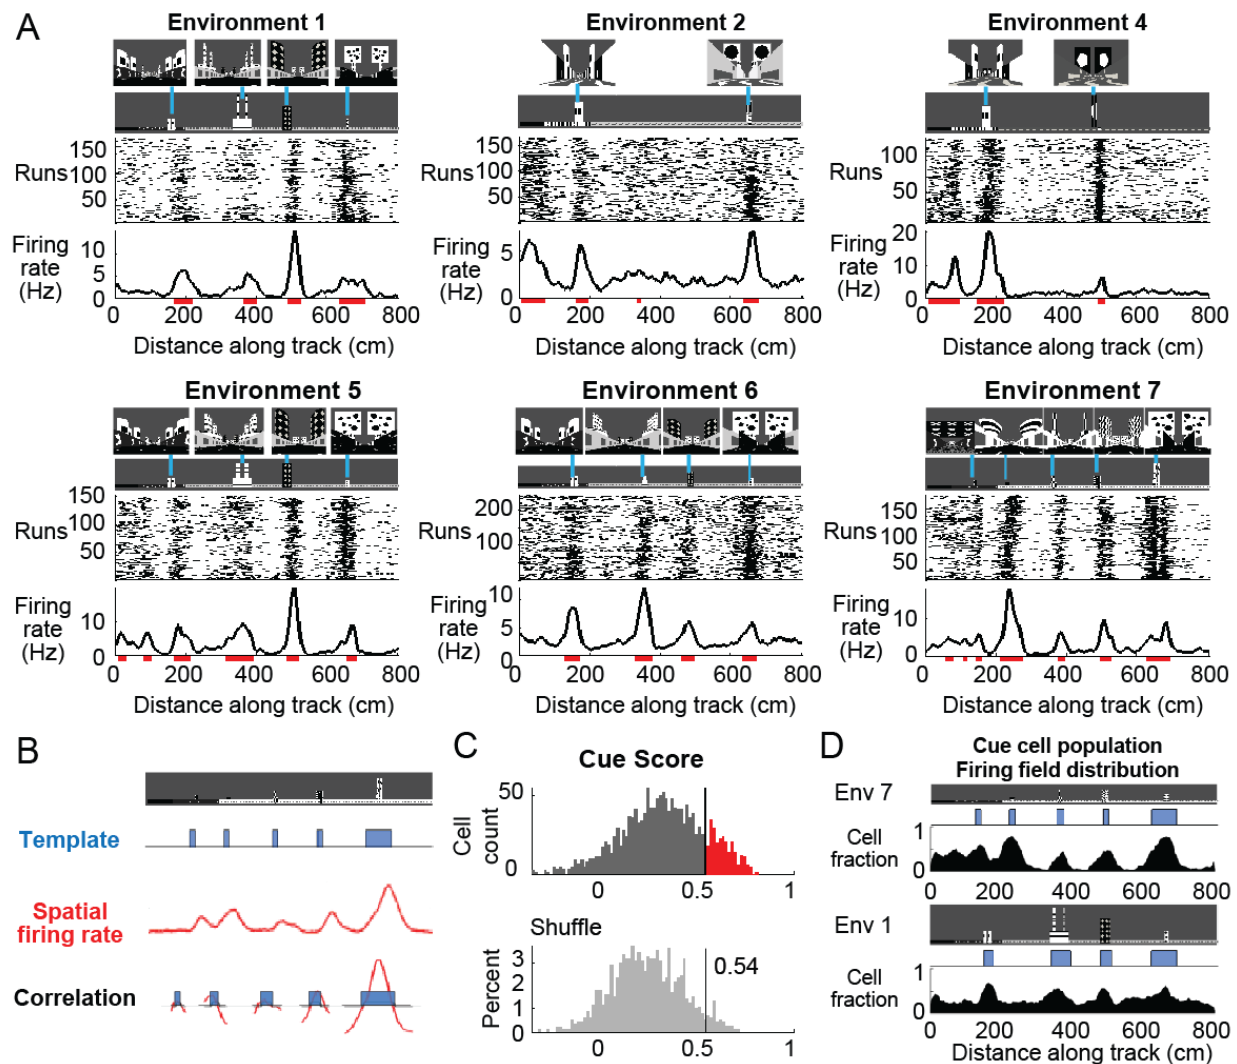

848

849 **Figure 1. Cells respond to cues in the environment.**

850 A. Examples of cells with cue-related activity recorded during navigation along virtual tracks. At the top  
851 of each example are views of each cue from the animal's perspective inside the track at that location.  
852 Side views of the track are shown below, with the start location to the left. The raster plot for a single  
853 cell's spatial activity pattern across multiple traversals of the track is plotted with the average firing  
854 rate (Hz) as a function of track position (spatial firing rate) below. Spatial firing fields for the cell are  
855 indicated with horizontal red bars.

856 B. Calculation of cue score. The Pearson correlation between the cue template and the cell's spatial firing  
857 rate was calculated, then the cue template was shifted to where it was maximally correlated with the  
858 spatial firing rate and the correlations of cue template and spatial firing rate at each cue were  
859 individually calculated. The cue score was defined to be the mean of these correlations (Materials and  
860 Methods).

861 C. The distribution of cue scores of recorded cells is shown at the top with the distribution of cue scores  
862 calculated on shuffled data shown below. The threshold was chosen as the value that 95% of the

863 shuffled scores did not exceed (vertical black line). Cells exceeding this threshold were termed ‘cue  
864 cells’ and are shown in red in the top plot.

865 D. Distribution of spatial firing fields of all cue cells in two environments.

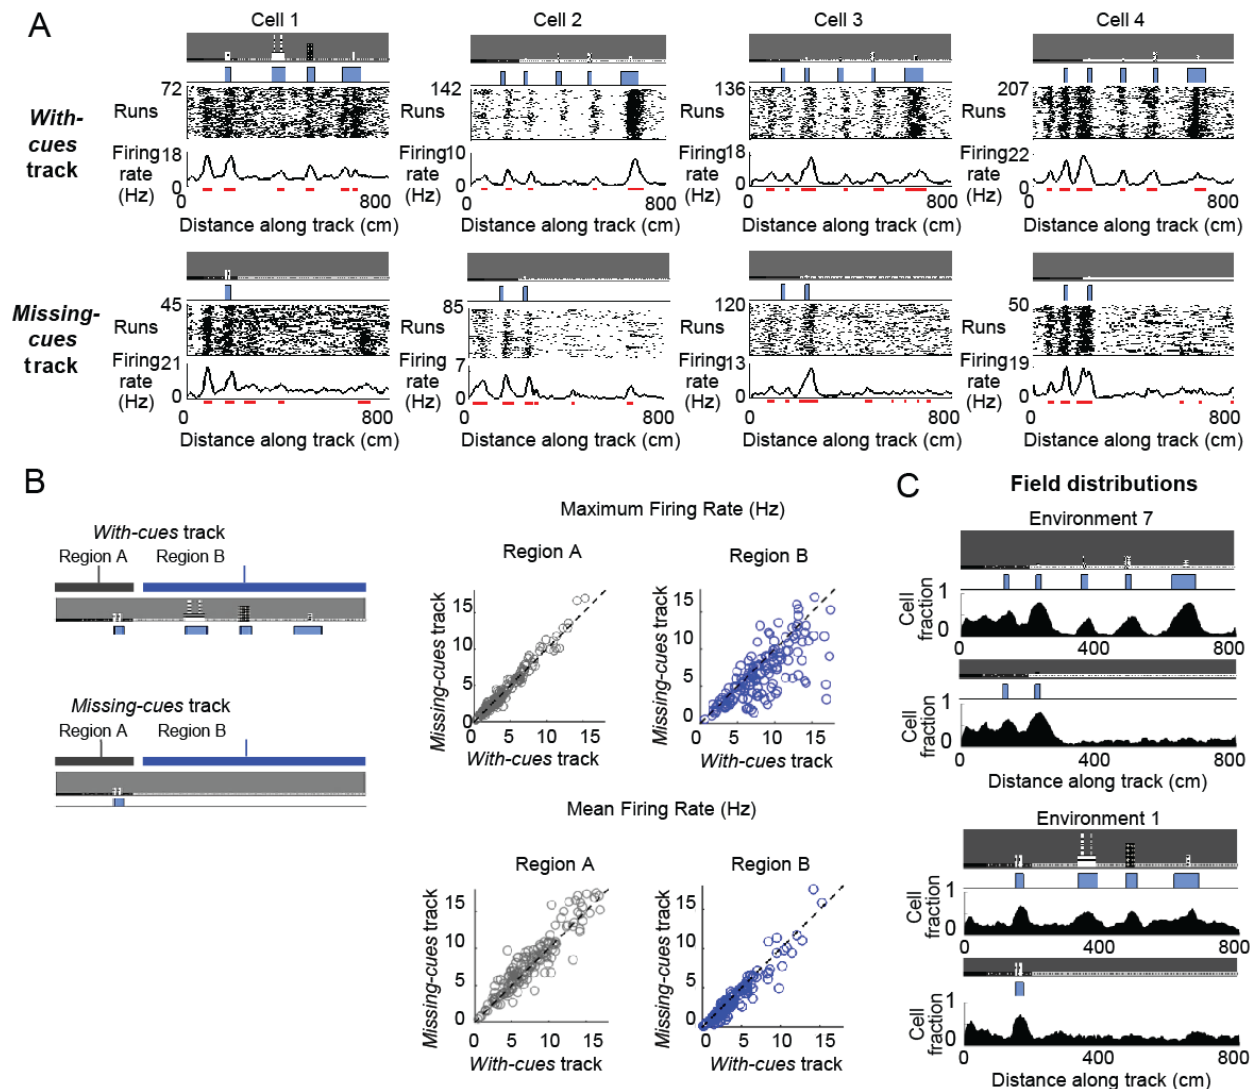

866

867 **Figure 2. Cells respond to cue changes in environment**

868 A. Examples of the spatial firing rates of cells during cue perturbation experiments. For each example,  
 869 the top and bottom panels are from the same cell in blocks of trials in which the animal either ran  
 870 down a virtual track with all cues present (*with-cues track*, top) or a track where some cues were  
 871 missing in the later part of the track (*missing-cues track*, bottom). The environment and cue template  
 872 for both environments are shown with the corresponding raster plots and spatial firing rates below.  
 873 Cell 1: T5 20140211 t7 c2, Cell 2: T8 20140315 t8 c2, Cell 3: T10 20140326 t2wref c2, Cell 4: T10  
 874 20140313 t6wref c3.

875 B. Comparison of firing rates of all cue cells between runs in the initial region that is the same for both  
 876 tracks (Region A) and the later region (Region B) that either had cues (*with-cues track*) or missed  
 877 cues (*missing-cues track*) (left). The maximum and mean firing rates in these regions of the two tracks  
 878 are plotted to the top and bottom on the right.

879 C. Population field distribution for the entire population of cue cells along *with-cues* and *missing-cues*  
 880 tracks for two environments.

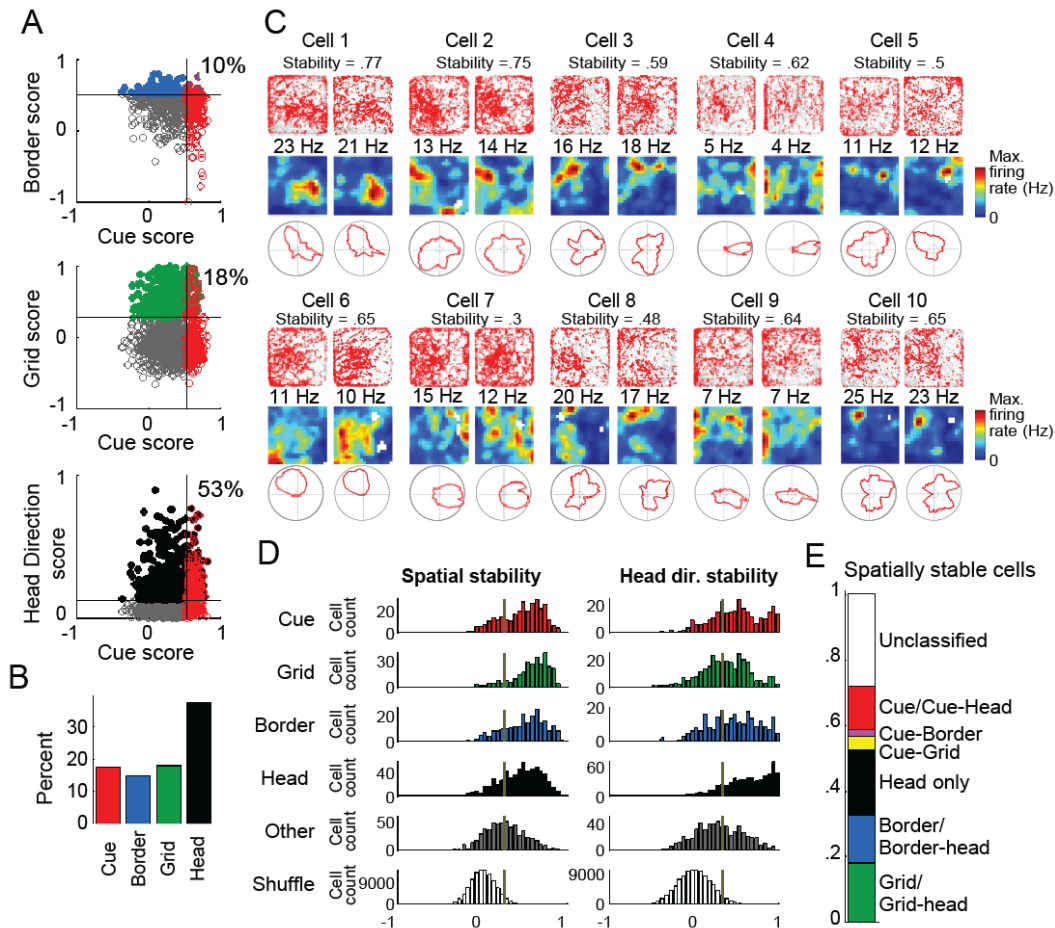

881

882 **Figure 3. Cue cell activity during foraging in a real arena**

883 A. Relative distributions of cue scores compared to border, grid, and head direction scores. Thresholds  
 884 were calculated as the value that exceeds 95% of shuffled scores. The solid line indicates the  
 885 threshold for each score that was used to determine the corresponding cell type (Materials and  
 886 Methods). Cells are color-coded for whether they are cue (red), grid (green), border (blue), or head  
 887 direction cells (black). The percentage of the cue cell population that was conjunctive for border, grid,  
 888 and head direction is shown on each plot.

889 B. Percentage of each cell type in the dataset.

890 C. Examples of cue cells' spatial firing rate in a real arena and their spatial stability. The recording of  
 891 each cell was divided in half. The activity features of the first and second halves are shown for each  
 892 cell in the left and right columns. For each column of each cell: top: plots of spike locations (red dots)  
 893 and trajectory (gray lines); middle: the 2D spatial firing rate (represented in a heat map) with the  
 894 maximum firing rate indicated above; bottom: head direction firing rate. The stability was calculated  
 895 as the correlation of these two firing rates and shown under the cell number.

896 D. Histograms of the spatial and head direction stability of the 2D real environment firing rates by cell  
 897 type.

898 E. Percentage of 2D real environment stable cells that are of a certain type. Cell types are color-coded:  
 899 red = cue cell, green = grid cell, blue = border cell, black = head direction cell. The threshold for

900 spatial stability was calculated as the value that exceeds 95% of score values for the shuffled  
901 distribution.

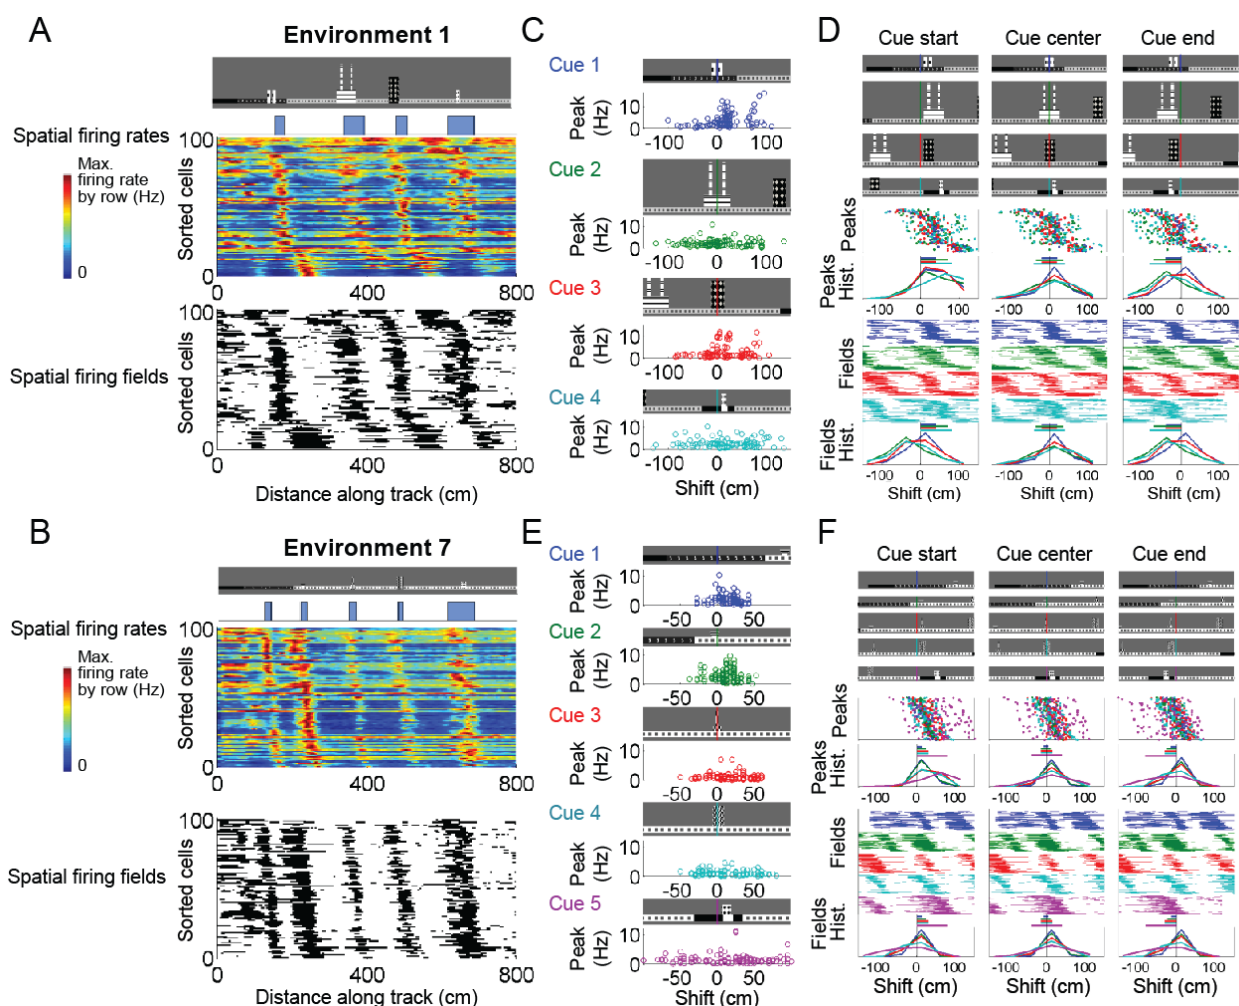

902

903 **Figure 4. Cue cells form a sequence aligned at each cue**

904 A. Cue cell sequence in an environment. Top two rows show a side view of the virtual track and the  
 905 corresponding cue template below. The spatial firing rates (middle) and corresponding spatial firing  
 906 fields (bottom) are shown for all cue cells recorded during navigation in a single environment. Each  
 907 row is the firing rate of a single cell along the track, normalized by its maximum. The cells are sorted  
 908 based on their spatial shifts calculated for alignment of spatial firing rates to the cue template (using  
 909 the spatial shift of maximal correlation of the firing rate to the cue template, Materials and Methods).  
 910 The firing fields are ordered in the same sequence as the firing rates.

911 B. Sorted spatial firing rates and corresponding spatial firing fields for a different environment.

912 C and E. The location of spatial firing rate peaks is plotted versus the peak heights for individual cues in  
 913 the two environments in A and B, respectively.

914 D and F. Alignment of cue cell sequences with different regions of cues in the environments in A and B,  
 915 respectively. For each environment, the top panels are side views of sections of the environment  
 916 around each cue (the earlier part of the track is to the left). Each row represents one cue. For each cue,  
 917 the start, center, and end of the cue are centered in the left, middle, and right panels, respectively.  
 918 Each cue is color-coded (vertical alignment bars in these plots and for the rest of the plots below, cue  
 919 1 = blue, cue 2 = green, cue 3 = red, cue 4 = cyan, cue 5 = purple). Since the cues were different

920 sizes, the alignment of cue cell activity differed when aligned to the start, center, or end of the cues.  
921 For the alignments with different parts of each cue, the lower panels show the locations of the peaks  
922 of the cue cell spatial firing fields (Peaks), the distribution of the peaks (Peaks Hist.), the cue cell  
923 spatial fields (Fields), and the distribution of the spatial fields (Fields Hist). Both the spatial firing  
924 field peak and spatial field distributions show that the alignment to the center of the cues produced the  
925 most similar distributions of cue cell activity across all cues.



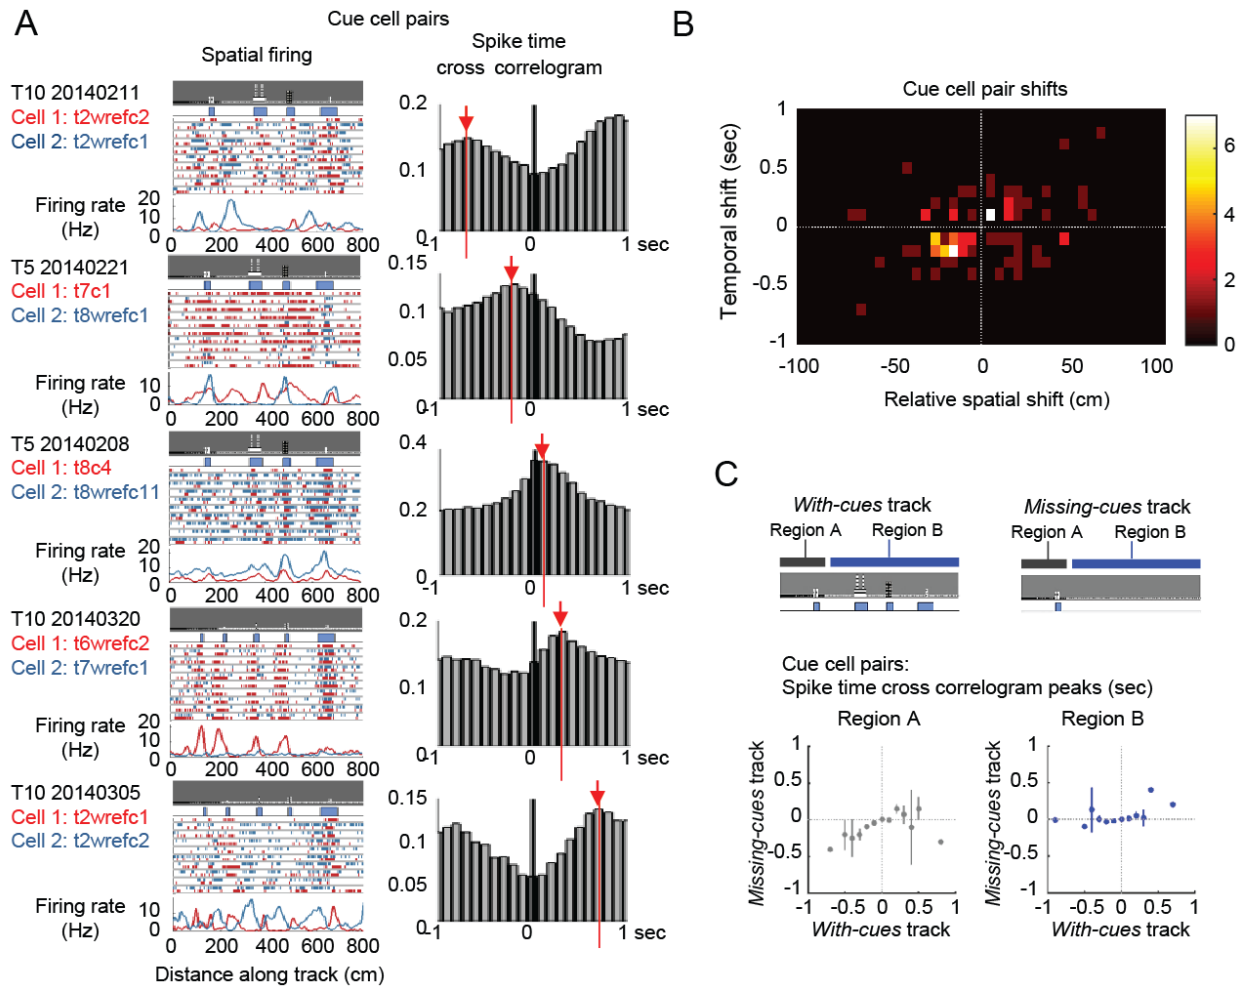

926  
927 **Figure 5. Cue cell pair activity and spatial and temporal shifts**

928 A. Temporal activity relationship between pairs of cells with spatial offsets of their spatial firing rate.  
929 For each cell pair: left: the spiking activity for the two simultaneously recorded cue cells. The raster  
930 plot shows the spike locations on 10 runs along the track for each cell (cell 1 spikes are red, cell 2  
931 spikes are blue). The spatial firing rates over all of the runs (not just for the ten runs shown) for both  
932 cells are plotted at the bottom. Right: the spike time cross-correlograms of the two cells with the  
933 temporal shift shown by a red line and arrow.

934 B. Spatial and temporal shifts for all pairs of simultaneously recorded cue cells. The relative spatial shift  
935 was defined as the shift at which the correlation between the two firing rates had a local maximum  
936 closest to zero. The temporal shift was the shift at which the spike time cross-correlogram had a local  
937 maximum closest to zero. All cells are plotted in a histogram for relative spatial and temporal shifts,  
938 excluding zero values (no shift) along either axis.

939 C. Temporal activity relationship between pairs of cells on *with-cues* and *missing-cues* tracks. Top:  
940 cartoons illustrating the track types and regions used for the data plotted below. For both tracks, the  
941 first region was identical in wall and cue locations (Region A). The second region (Region B) differed  
942 between the two tracks, one with cues (left, *with-cues* track) and one missing cues (right, *missing-*  
943 *cues* track). Data were sorted by different regions on the two tracks. Bottom: the mean +/- standard

944 error of the temporal shifts between cue cell pairs recorded on both tracks. Bottom left: the time shifts  
945 of the peaks in the spike time cross-correlograms of cue cell pairs are plotted for the two tracks in  
946 Region A. Right: the time shifts for cue cell pairs on Region B of the two tracks. There was a range of  
947 time shift values when cues were present (for the ‘*with-cues* track’ plotted along the x-axis).  
948 However, there were fewer nonzero time shifts when cues were not present (see the distribution of  
949 values along the y-axis for the ‘*missing-cues* track’ in Region B).

950

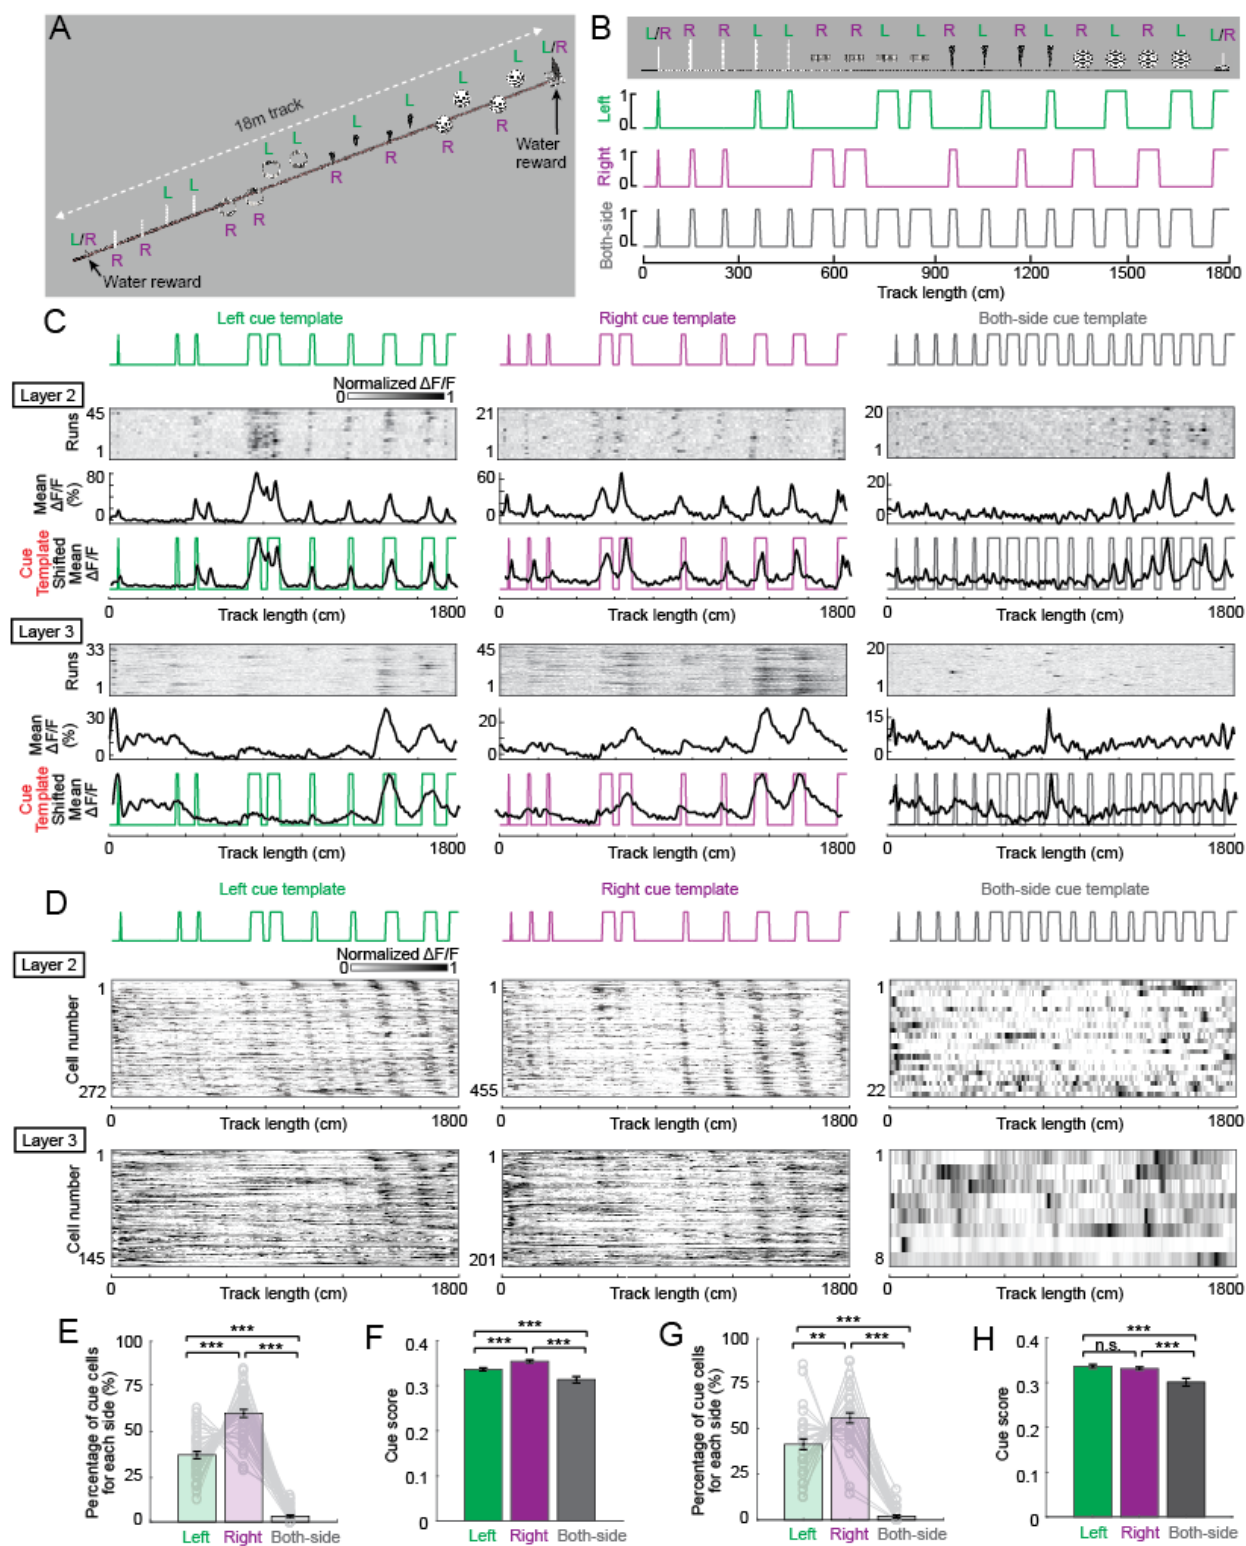

951

952 **Figure 6. Cue cell responses to side-specific cues in superficial layers of the MEC**

953 A. An 1800 cm (18 meter) long virtual track for imaging experiments. “L”, “R” and “L/R” indicate cues  
954 on the left, right and both sides of the track, respectively.

955 B. Three types of cue templates corresponding to cues on the left, right, and both sides of the track.

- 956 C. Examples of individual cue cells responding to the three side categories of cues in layers 2 and 3 of  
957 the MEC. For each cell: top:  $\Delta F/F$  versus linear track position for a set of sequential traversals.  
958 Middle: mean  $\Delta F/F$  versus linear track position. Bottom: overlay of the cue template and aligned  
959 mean  $\Delta F/F$  (black) according to the shift, which gave the highest correlation between them (Materials  
960 and Methods).
- 961 D. Cue cell sequences responding to the three side categories in layers 2 and 3. Each row is mean  $\Delta F/F$   
962 of a single cell along the track, normalized by its maximum. The cells are sorted by the spatial shifts  
963 of their mean  $\Delta F/F$  to the cue template.
- 964 E and F. Percentage (E) and cue scores (F) of cue cells in layer 2 responding to three side categories of  
965 cues. In E, each curve represents the percentage of left, right, and both-side cue cells (from left to  
966 right) in the whole cue cell population of a single FOV. Error bars: mean  $\pm$  SEM. All layer 2 cells  
967 shown in D were used in this analysis.
- 968 G and H. Similar to E and F but for layer 3 cue cells. All layer 3 cells shown in C were used in this  
969 analysis.

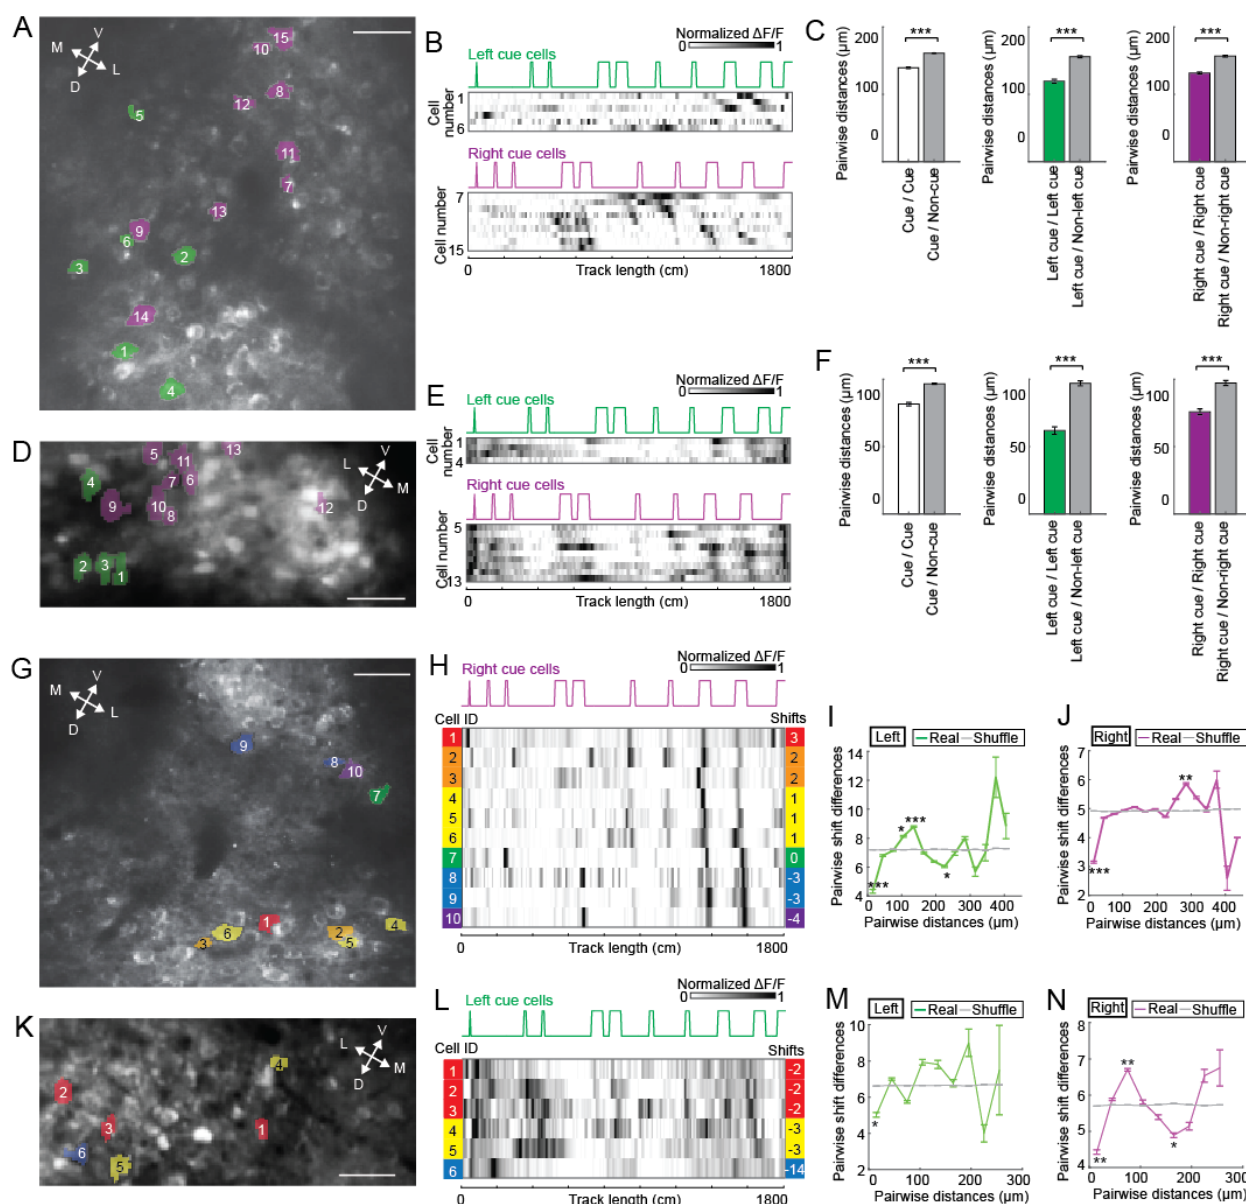

970  
971  
972  
973  
974  
975  
976  
977  
978  
979  
980  
981  
982

### Figure 7. Micro-organization of cue cells in layers 2 and 3

- A. A FOV in layer 2 of the MEC containing left (green) and right (magenta) cue cells. Cell indices are consistent with those in B. Anatomical orientations: D: dorsal; V: ventral; M: medial; L: lateral, same in the panels D, G, and K.
- B. Calcium responses of left and right cue cells shown in A. Each row is mean  $\Delta F/F$  of a single cell along the track, normalized by its maximum. The cells are sorted by the shift of their mean  $\Delta F/F$  to the cue template of their preferred side, same in panels E, H, and L.
- C. Pairwise distance between different cell types in layer 2. Non-cue cells included all cells in the MEC except cue cells. Non-left cue cells included all cue cells responding to right and both-side cues. Non-right cue cells included all cue cells responding to left and both-side cues. Error bars: mean  $\pm$  SEM. The analyses included 749 cue cells, 2170 non-cue cells, 272 left cue cells, 455 right cue cells and 22 both-side cue cells.

983 D-F. Similar to A-C but for layer 3 cue cells. The analyses in F included 355 cue cells, 1569 non-cue  
984 cells, 145 left-cue cells, 201 right-cue cells and 9 both side cue cells.

985 G. A FOV in layer 2 of the MEC containing right cue cells with different spatial shifts. Individual cue  
986 cells are color-coded according to their spatial shifts shown in H. Cell indices are consistent with H.

987 H. Calcium responses of the right cue cells in G and their spatial shifts to cues on the right side of the  
988 track.

989 I and J. Pairwise physical distance of left- (I) and right-cue cells (J) in layer 2 of the MEC versus pairwise  
990 difference of the spatial shifts of their mean  $\Delta F/F$  to the left and right cue templates, respectively.  
991 Error bars: mean  $\pm$  SEM. 1026 left-cue cell pairs and 2940 right-cue cells were used.

992 K and L. Similar to G and H but for left cue cells in a FOV in layer 3.

993 M and N. Similar to I and J but for layer 3 cue cells. 351 left-cue cell pairs and 733 right-cue cells were  
994 used.

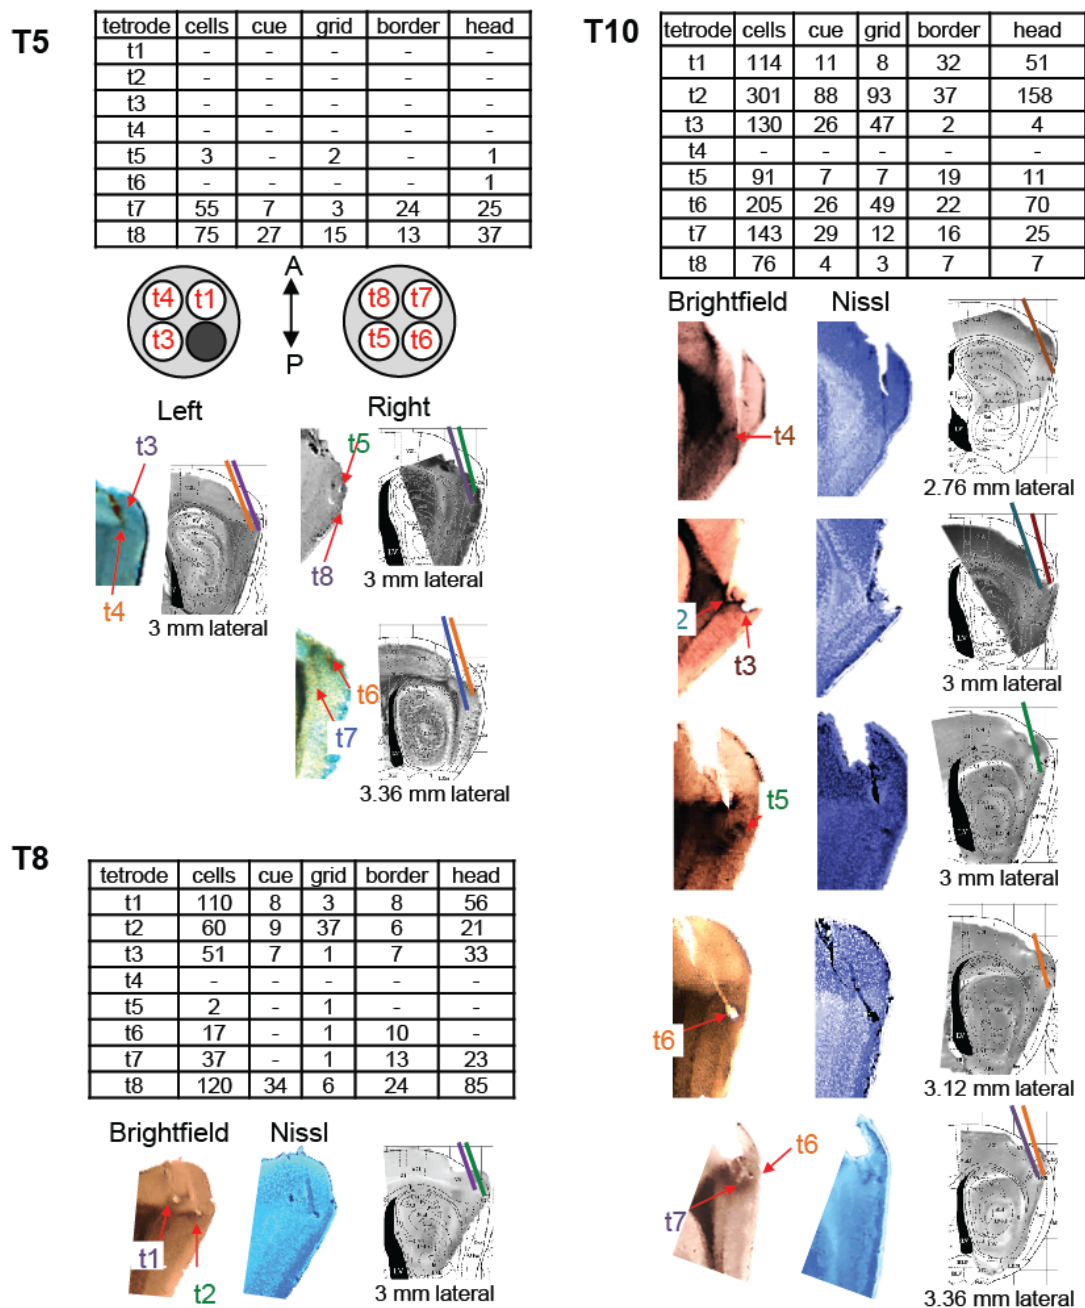

995  
996

### Supplementary Figure 1. Histology

997 For each animal, T5, T8, and T10, a summary table shows the number of cells in the database from each  
998 tetrode, as well as the number of cue, grid, border and head direction cells within that population. For T5,  
999 an example of the orientation of the tetrodes within the cannula on either side of the brain is shown. This  
1000 was used as a guide to identify individual tetrodes based on the tetrode tracks and lesions in the brain. The  
1001 images of sagittal brain sections taken under the bright field microscope and the fluorescence microscope  
1002 after fluorescent Nissl stain are shown for individual animals. Individual tetrodes were identified, color-  
1003 coded and labeled in the figure. All images were sharpened and recolored to emphasize tetrode tracks and  
1004 lesions.

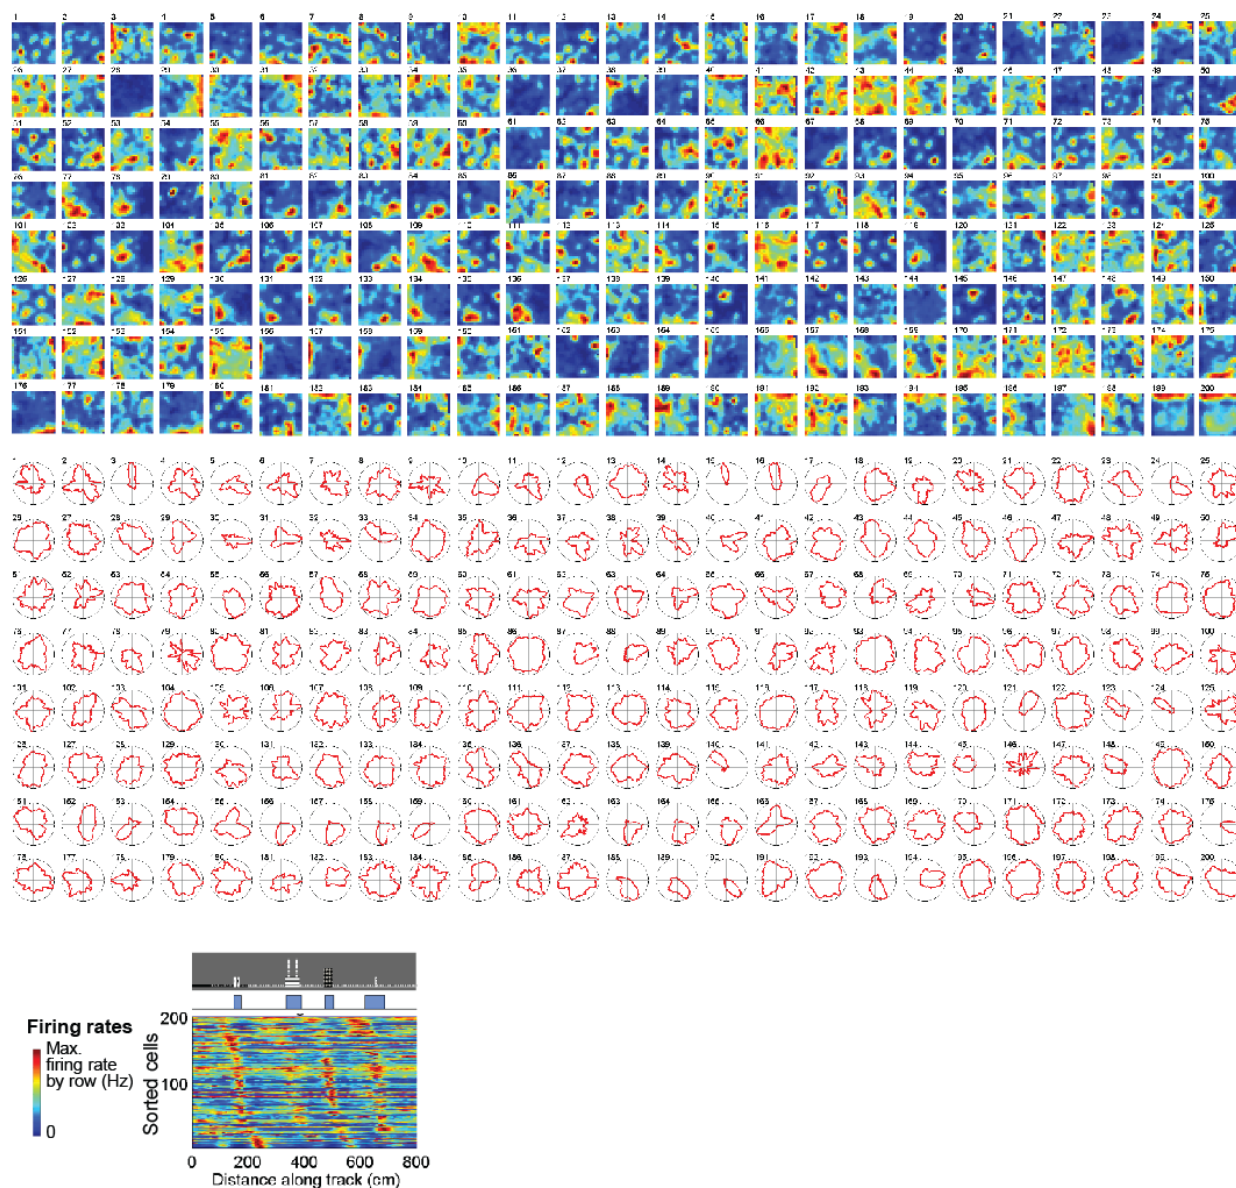

1005  
1006 **Supplementary Figure 2. Cue cell activity in real arenas**  
1007 Top and middle panels: the spatial and head direction firing rates of cue cells in a real arena are sorted  
1008 based on the spatial shifts of their spatial firing fields to the cue template in virtual reality (bottom panel).  
1009 No clear patterns of changes in number, size and location of firing fields or the mean vector length of  
1010 head direction firing rates were observed.



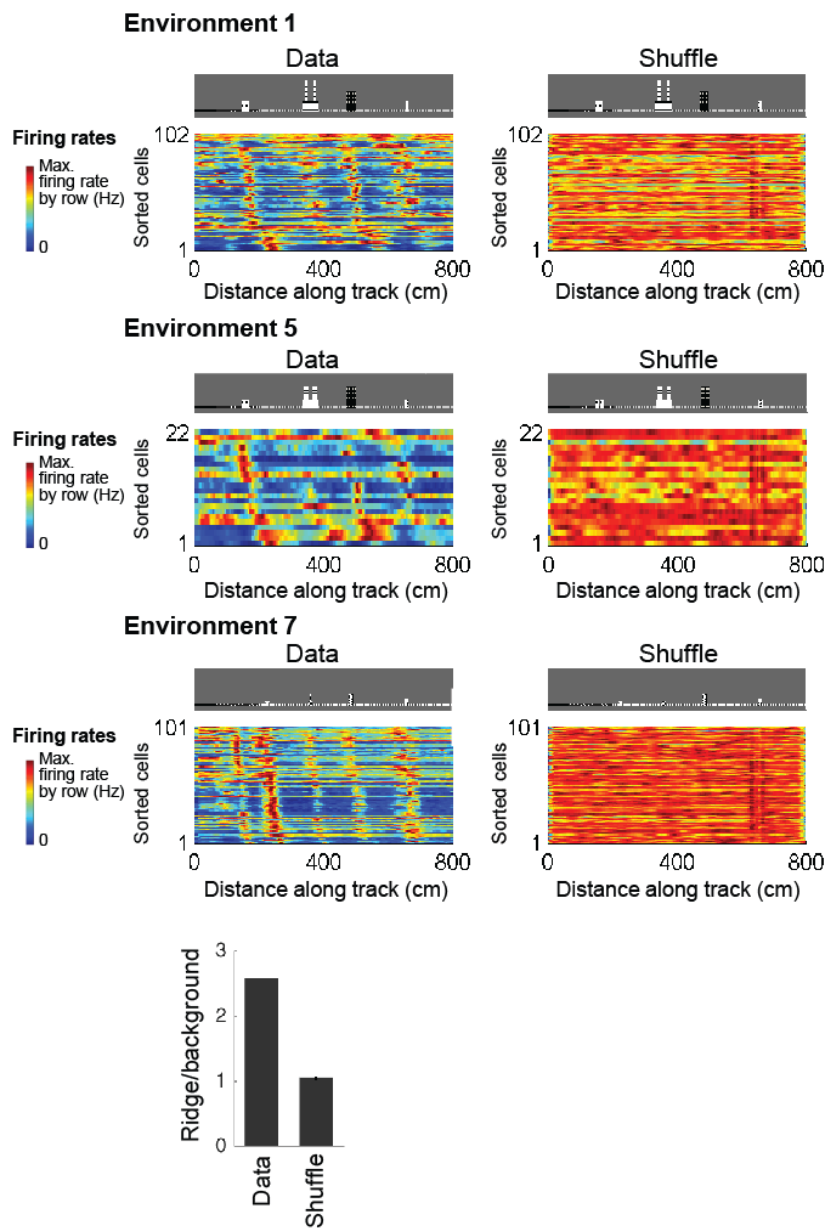

1011  
1012 **Supplementary Figure 3. Cue cell sequences and the ridge/background ratio compared to shuffled**  
1013 **data**

1014 For each environment, left: spatial firing rates (normalized by each cell's maximum firing rate) of cue  
1015 cells were sorted by their shifts relative to the cue template; right: an example of one set of shuffled firing  
1016 rates of all cue cells. The shuffled spatial firing rates were also sorted by the spatial shifts relative to the  
1017 cue template. Bottom: mean ridge/background ratios for all cue cells (2.58, left) and all shuffles (1.04+/-  
1018 0.003, right). Error bars: mean +/- STD.

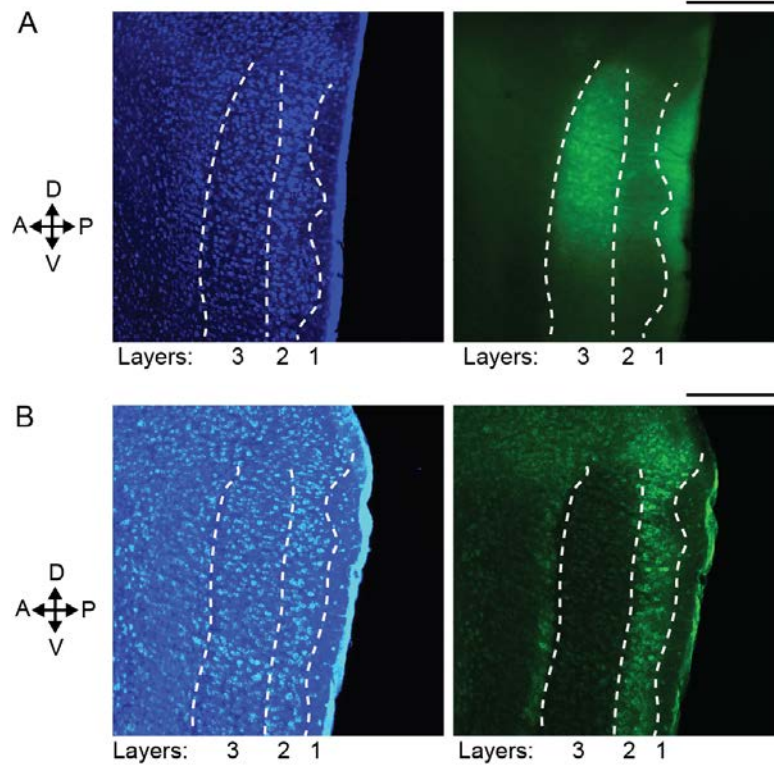

1019

1020

**Supplementary Figure 4. Layer-specific expression of GCaMP6f in the mouse MEC**

1021

A. Expression of GCaMP6f in layer 3 of the MEC, shown by a sagittal brain slice of a wild type mouse, prepared 13 days after the injection of AAV2/1-hSyn-GCaMP6f virus to the MEC. Left: blue epifluorescence image showing cell bodies in layers 2 and 3 (between white dotted curves) of the MEC labeled by fluorescent Nissl staining. Right: green epifluorescence image of the same slice on the left showing GCaMP6f expression of dorsal layer 3 neurons in the MEC. Scale bar: 200  $\mu$ m.

1025

1026

B. Expression of GCaMP6f in layer 2 of the MEC, shown by a sagittal brain slice of a GP5.3 mouse, 5 months of age. Left: blue epifluorescence image showing cell bodies in layers 2 and 3 (between white dotted curves) of the MEC labeled by fluorescent Nissl staining. Right: green epifluorescence image of the same slice on the left showing GCaMP6f expression of layer 2 neurons in the MEC. Scale bar: 200  $\mu$ m.

1027

1028

1029

1030

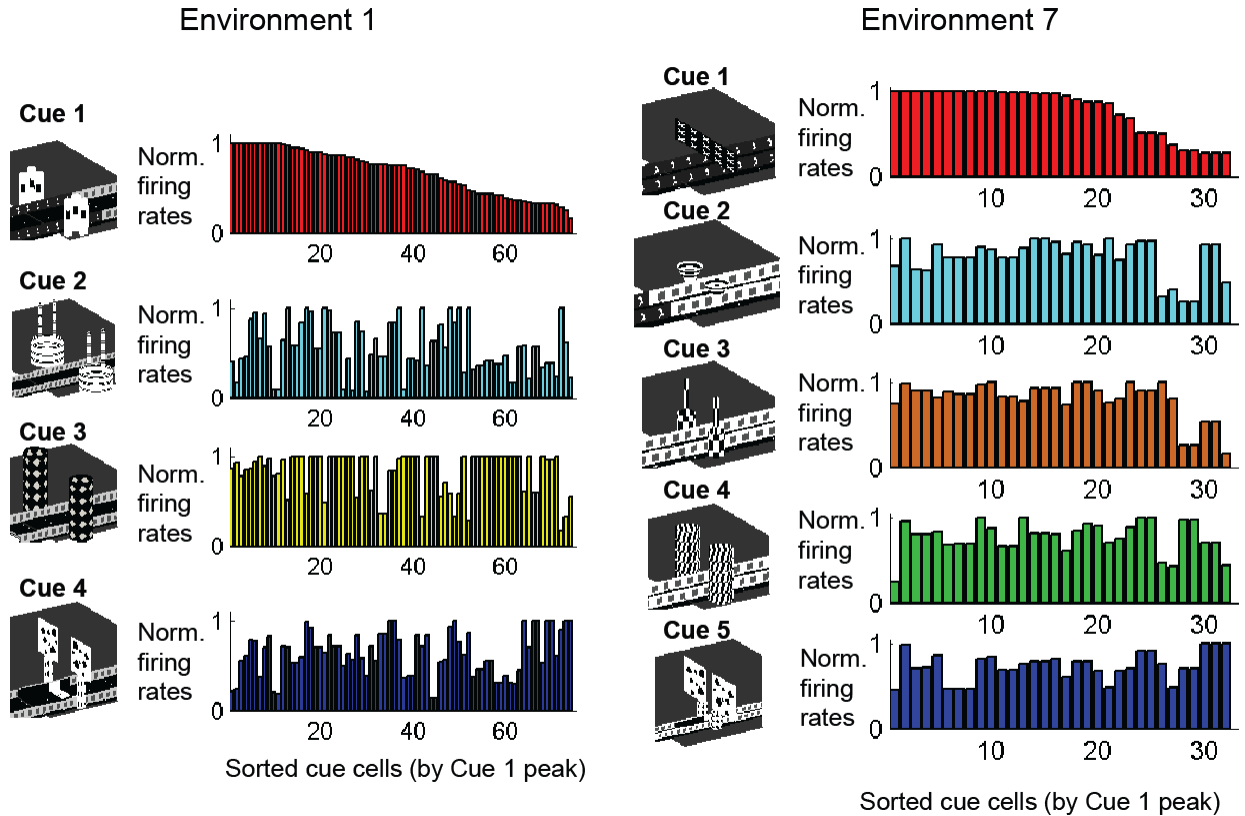

1031

1032 **Supplementary Figure 5. Identity of each cue is encoded by population of cue cells**

1033 Cue cell firing rates around individual cues in two different environments (left and right). In each  
1034 environment around each cue, cue cell firing rates are sorted by the relative peak amplitude of the spatial  
1035 firing rates at the first cue of the environment. Firing rate peaks for subsequent cues are sorted in the same  
1036 order as for the first cue. The firing rate peak amplitude for a cue cell at a single cue is not predictive for  
1037 the amplitude of the peaks at other cues but is predictive for the spatial shifts of the peaks from other  
1038 cues. For this reason, the amplitude of the firing rate peaks might encode cue features or identity.
